# Supplementary material
Source: PubMed Central journal article supplement (PMC6748342)
Supplement: MD-010-C9MD00140A-s002.pdf [file MD-010-C9MD00140A-s002.pdf]

CONTENTS:

Entry 1S. Asymmetric Unit for [Cp\*IrCl(cis-1,2-diaminocyclohexane)]Cl CCDC1901126

Entry 2S. Asymmetric Unit for [Cp\*IrCl(trans(+)-1,2-diaminocyclohexane)]Cl CCDC1901125

Entry 3S. SAFETY STUDY IN MICE OF AN AGENT WITH POTENTIAL AS AN ANTIINFECTIVE

Entry 4S. PDF of Excel Spreadsheet of data behind Figure 8.

Entry 5S. PDF of Excel Spreadsheet of raw ICP data.

Entry 6S. Explanation of Gaussian Calculations of Compound 1 Conformer Changes

Entry 7S. Tables of Data and Bond lengths and Angles for Compound 1. CCDC1901126

Entry 8S. Tables of Data and Bond Lengths and Angles for Compound 2. CCDC1901125

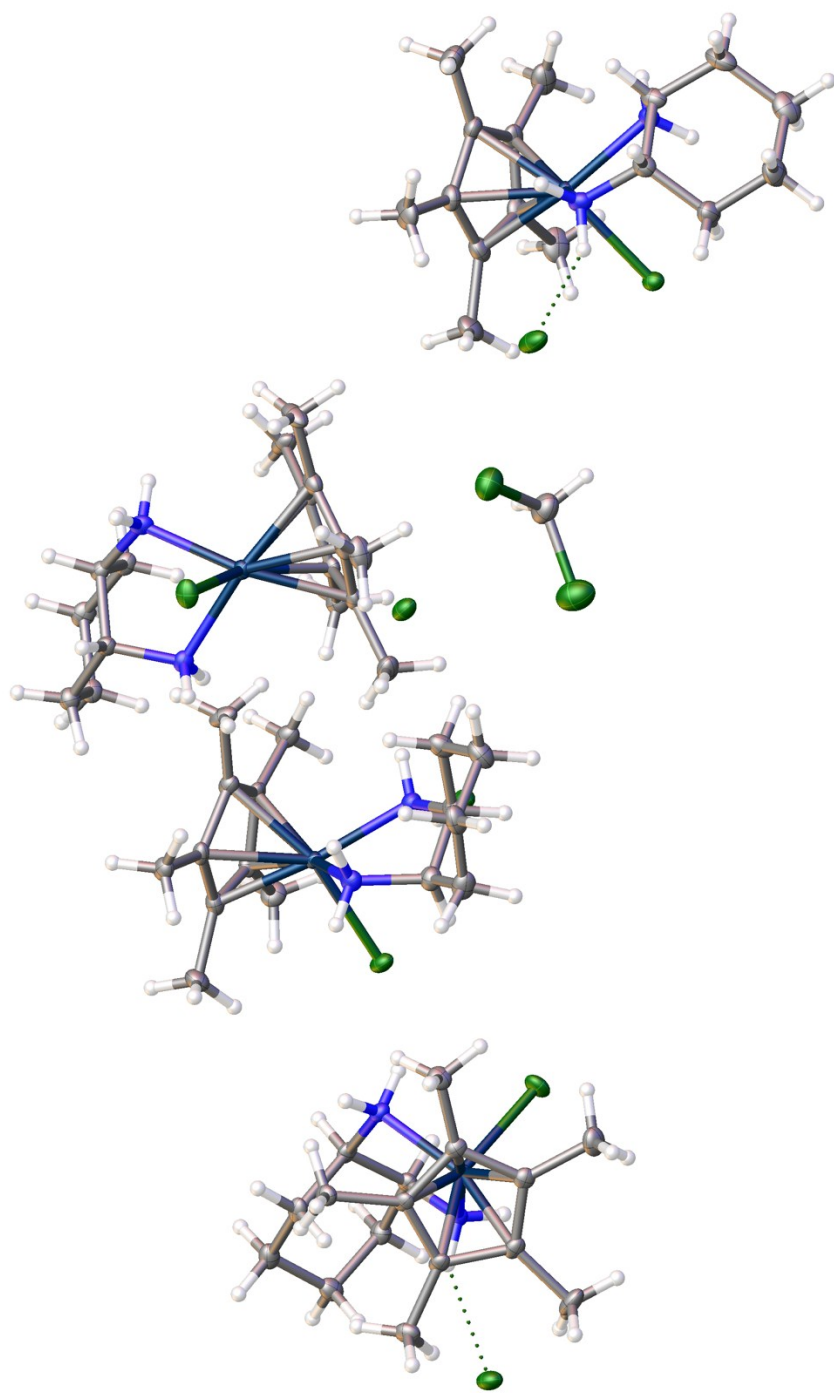

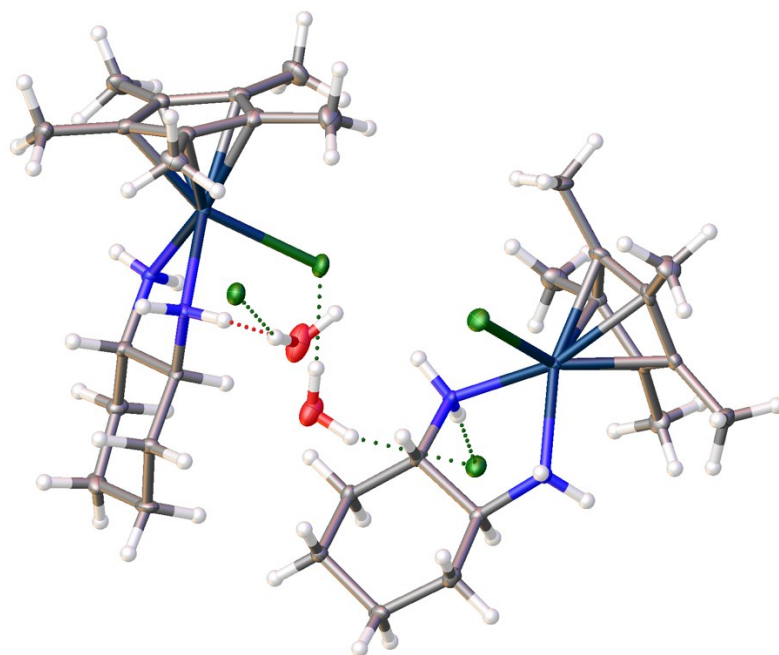

## Entry 3S. SAFETY STUDY IN MICE OF AN AGENT WITH POTENTIAL AS AN ANTIINFECTIVE

M Ehrich<sup>1</sup>, J Hinckley<sup>1</sup>, BS Jortner<sup>1</sup>, K. Boes<sup>1</sup>,

<sup>1</sup>Virginia-Maryland College of Veterinary Medicine

### ABSTRACT

*In vitro* experiments resulted in the discovery that a series of iridium (Ir) ethylene diamine I complexes exhibited antimicrobial activity against *Staphylococcus aureus* and methicillin-resistant *S. aureus* at 1-10 µg/ml. For the initial toxicity screening, we examined one of the most active compounds; 3-Ir. The safety study was conducted in groups of adult male mice given a single dose of 5 mg/kg by intravenous (IV) administration. Mice were examined for a series of behavioral indices using a modified functional observational battery at 1, 4 and 6 hr, and 1, 2, 7, 9, 12 and 14 days post-dosing (Tegeria and Balster, Tox Sci 22:240). Body weight was measured and recorded at the time of each assessment. Blood and tissue samples were collected at 24 hr, 4 days and 14 days for clinical pathology and histopathological assessment. Of the animals receiving 3-Ir, 5/19 animals showed immediate signs of distress following dosing. Signs of distress ceased within one minute and animals appeared to have normal appearance, activity and locomotion within 5 minutes. No subsequent evidence of neurobehavioral, clinical or histopathological detriments was noted. The doses tested in this IV safety study are within the mg/kg range of currently used drugs. In circumstances such as used here, neurobehavioral or pathological detriments after single administration would be unlikely. These compounds, therefore, have potential to be a useful new class of antimicrobial agents. (Supported by the Virginia Tech Foundation)

### PURPOSE:

- Merola/Falkinham discovered a series of metal complexes of amino acids with antimicrobial activity at very low concentrations (1-10 µg/ml) against G<sup>+</sup>, G<sup>-</sup> and mycobacteria.
- Further development as potential therapeutic agents requires safety be comprehensively assessed.

### METHODS:

- *Test Compound Characterization:* analytically pure as evidenced by NMR spectroscopy, mass spectroscopy and other laboratory techniques. Soluble in saline, pH 6.5-7. Not cytotoxic to Vero cells at a concentration of 250 µg/ml.
- *Animal Dosing:* Outbred mice were given one IV dose of 2.5 or 5 mg/kg test compound.
- *Neurobehavioral Assessment:* 1-3 day before, 1, 4, 6 hr, 1, 2, 7, 9, 12 and 14 days after dosing. Body weights were evaluated as present/absent or normal/abnormal locomotor activity, posture, coat and tail condition, respiration, excretion and secretions, reflexes.
- *Pathology:* Blood samples collected for standard clinical pathology panel that included blood chemistry; histopathological examination of heart, kidney, liver, and other organs assessed.

### RESULTS:

- *At Dosing:* 5/19 dosed mice showed abnormal respirations, tremors, jumping, or crouched posture immediately following dosing. These ceased within one minute, and all had normal appearance, activity and locomotion in < 5 min.
- *Behavioral Assessment:* No significant differences between groups for all variables except coat condition, which occurred at 12 and 14 days post-dosing. In the absence of significant differences of other variables, the statistician (Dr. S. Werre) suggested that this was a chance occurrence.

- **Clinical Pathology:** No effect on erythrocytes and indices, white blood cell or platelet concentrations noted. Most parameters of clinical pathology were not affected by treatment. Non-adverse effects of treatment included minimal increases in sodium and chloride and decreases in potassium at 4 and 14 days after IV administration of the compound at 2.5 mg/kg and 5.0 mg/kg concentrations. These non-adverse effects are biologically insignificant, so do not have toxicologic significance.
- **Histopathology:** No significant treatment-related lesions were noted at any of the sacrifice intervals (post-dosing days 1, 4 or 14). There were a few background lesions noted in controls or in both controls and high-dose rats. Given the focal nature and low incidence of these, they are considered background lesions, and not of toxicologic significance.

CONCLUSIONS:

- IV administration of drugs results in immediate high blood concentrations. Signs that appeared immediately did not appear in all mice, and disappeared rapidly. No longer-term toxic effects were evident.
- The iridium compound administered to mice as a single IV injection was generally nontoxic, as long as the dose was below 5.0 mg/kg, with neurobehavioral or pathological detriments after a single administration unlikely.

Figure : Time-related effect of <10 µg/ml iridium-containing agent on survival of *Staphylococcus aureus*

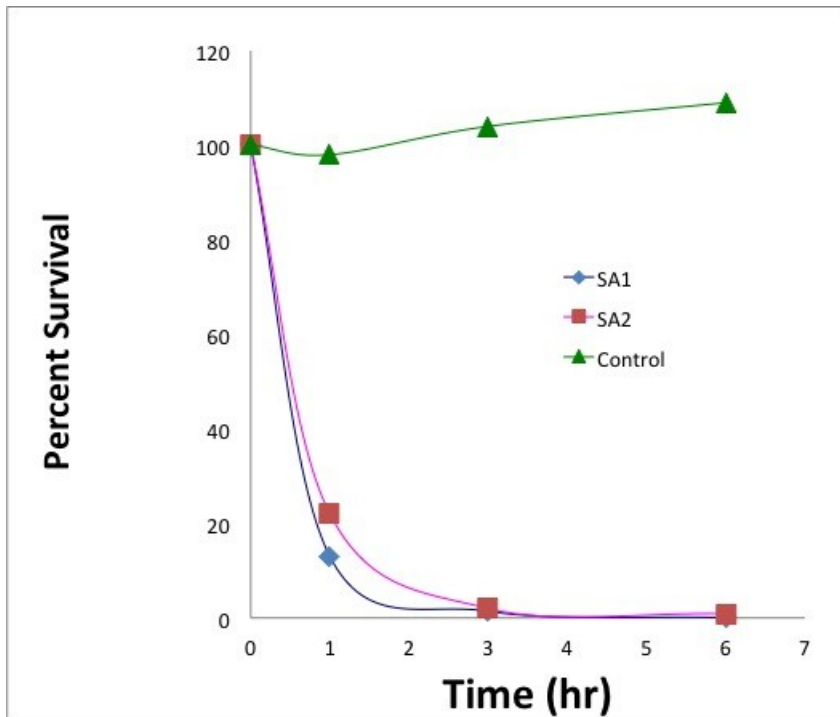

This one is for *S. aureus*.

Figure 2: Time-related effect of <math><10 \mu\text{g/ml}</math> iridium-containing agent on survival of methicillin resistant *Staphylococcus aureus* (MRSA)

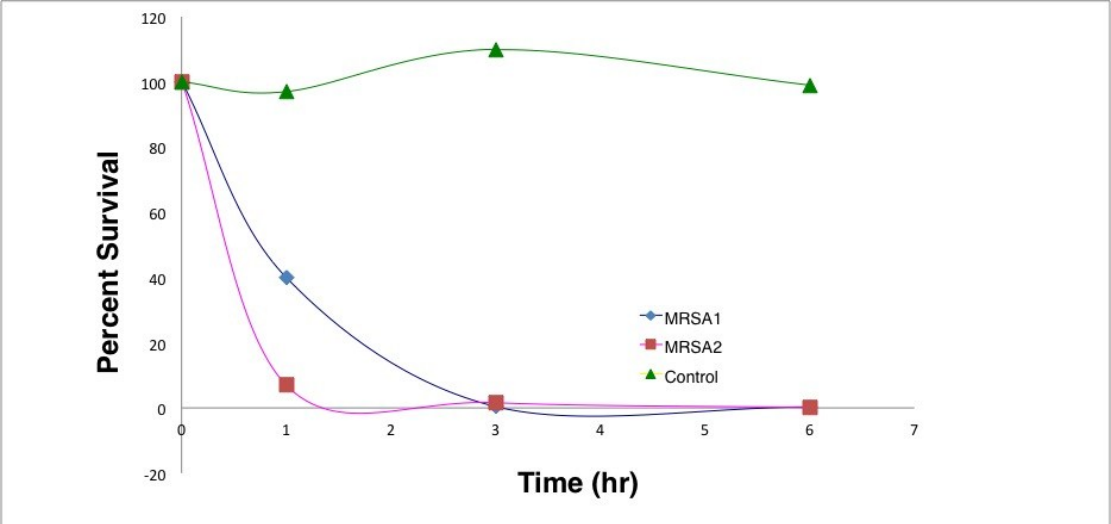

Complex structure

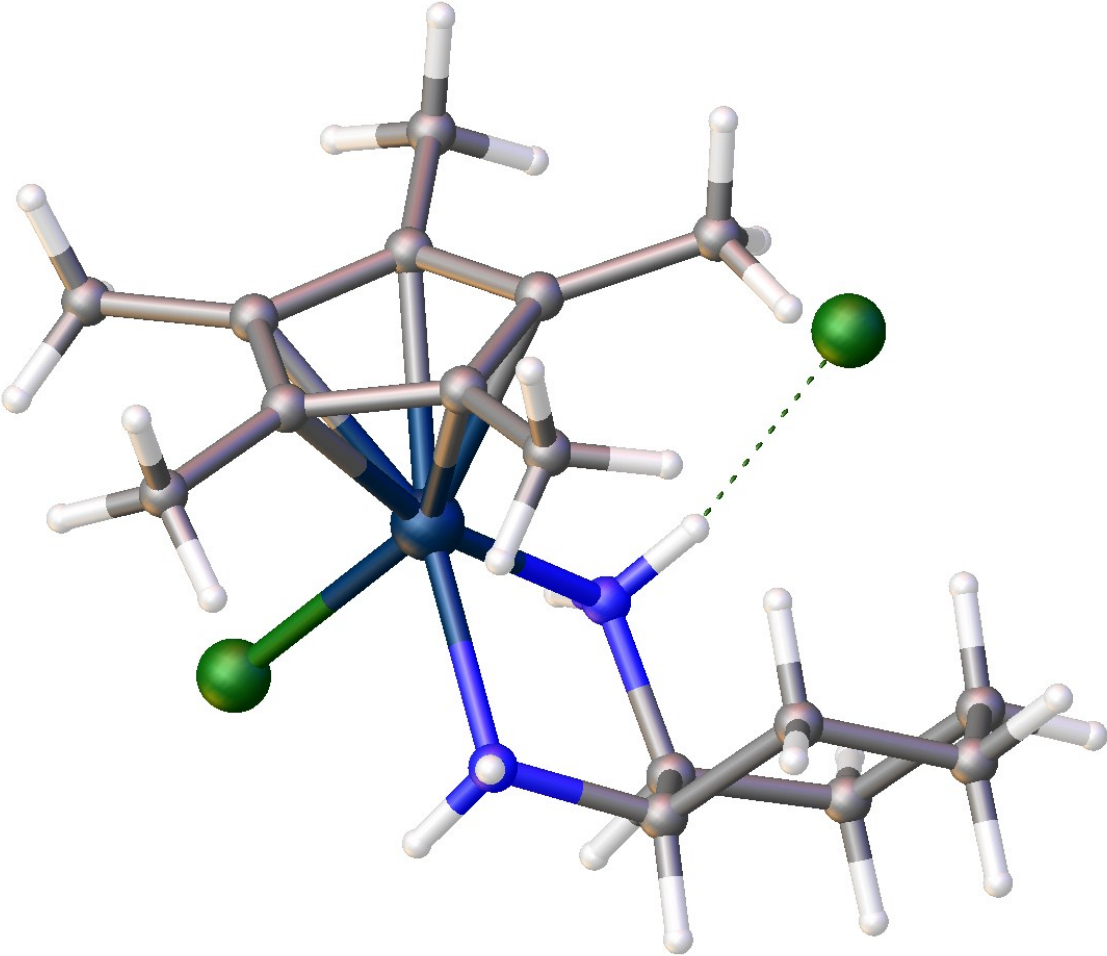

Figure 4 (sodium), Figure 5 (chloride), Figure 6 (potassium): One-way analysis of select plasma biochemical results by sacrifice day and/or test group. Solid dots represent each test result. Mean diamonds display the group means (center horizontal line of each diamond) and 95% confidence intervals for the group mean (vertical span of each diamond). The grey horizontal line that spans the length of the graph represents the grand mean for all mice.

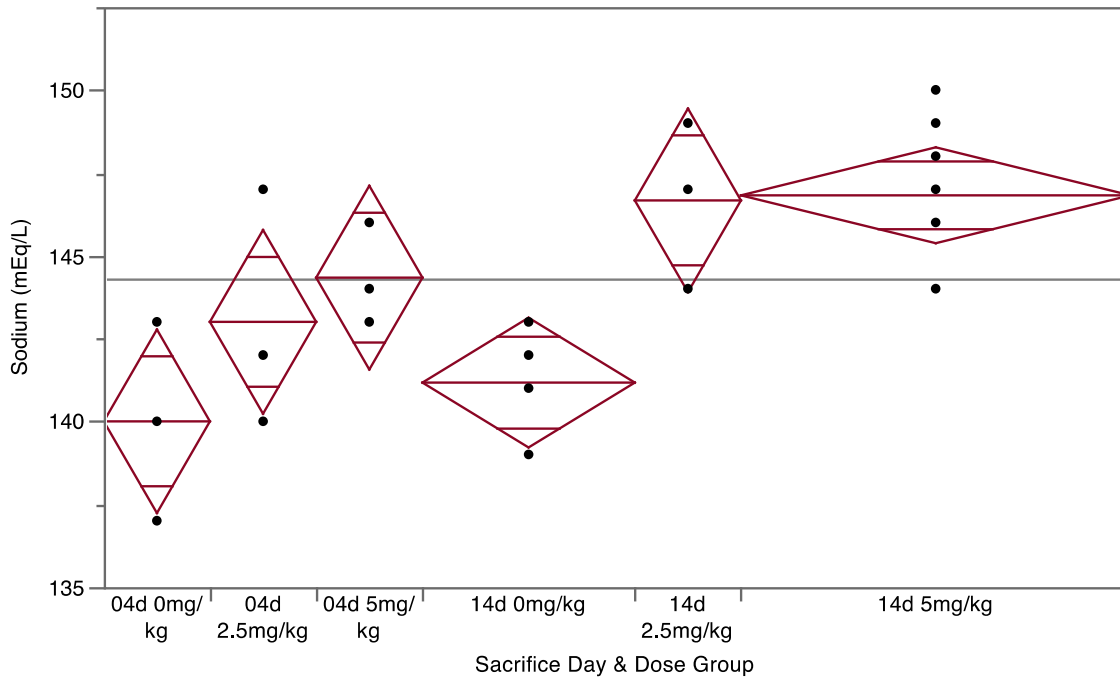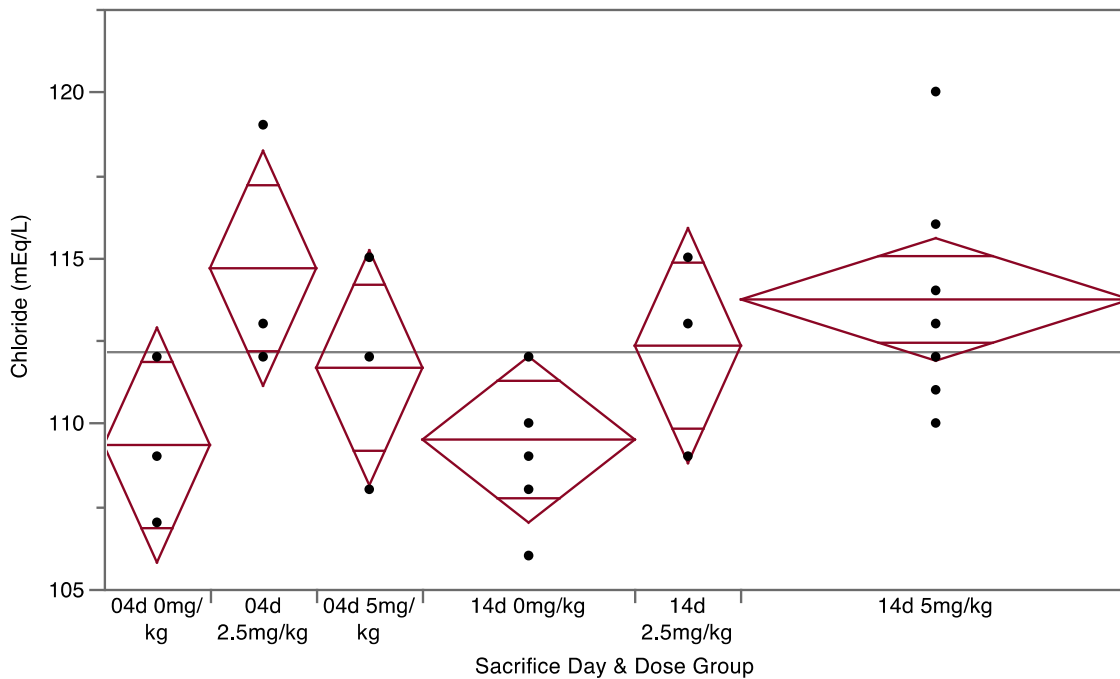

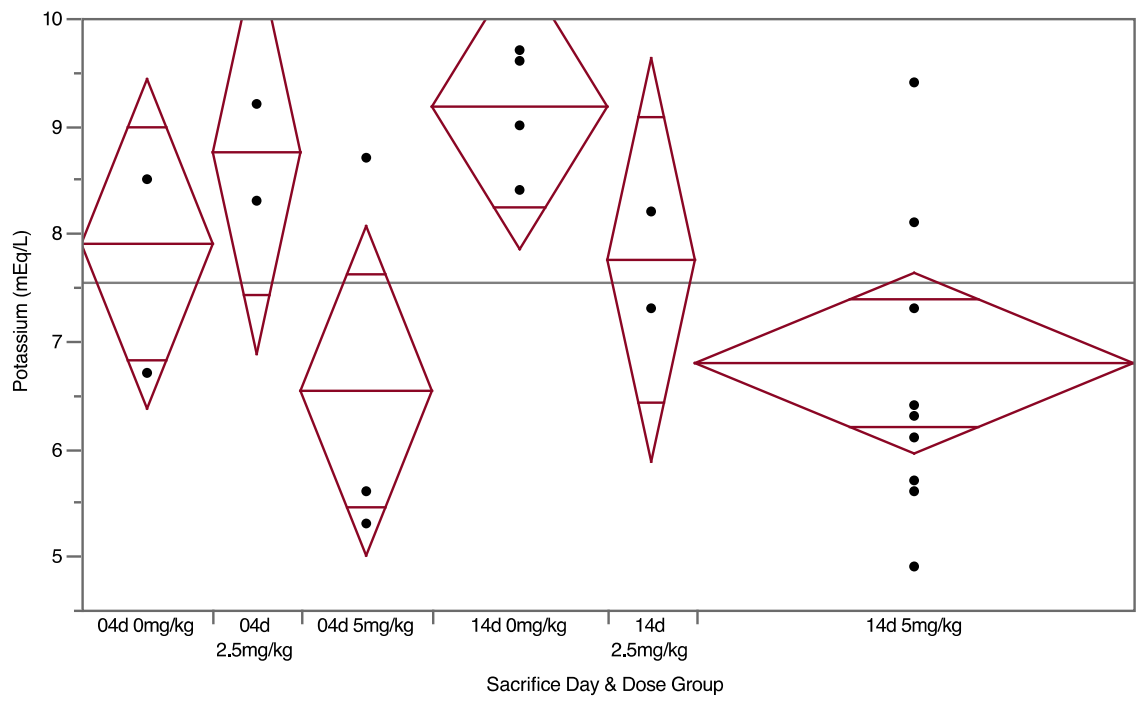



Have decided to leave the table below out for the present time as the poster should not become too crowded. (SOT always warns about not having a poster become a manuscript on a board.) Need to see what the first design looks like before considering putting this in.

Table 1. Summary of statistically significant changes between means of results grouped by dose group and sacrifice day.

| Group                                         | Parameter    | Group Means  | Units | p-Value | Harlan RI   |
|-----------------------------------------------|--------------|--------------|-------|---------|-------------|
| High <sub>4d</sub> v. Control <sub>4d</sub>   | BUN          | 24.0 v. 36.7 | mg/dL | 0.0110  | 17.2 – 27.2 |
|                                               | Creatinine   | 0.07 v. 0.17 | mg/dL | 0.0391  | 0.1 – 0.5   |
| High <sub>4d</sub> v. Low <sub>4d</sub>       | Creatinine   | 0.07 v. 0.17 | mg/dL | 0.0391  | 0.1 – 0.5   |
|                                               | T. Bilirubin | 0.2 v. 0.8   | mg/dL | 0.0375  | 0.1 – 0.5   |
| Low <sub>14d</sub> v. Control <sub>14d</sub>  | Sodium       | 147 v. 141   | mEq/L | 0.0291  | 158 – 170   |
| High <sub>14d</sub> v. Control <sub>14d</sub> | Basophils    | 3 v. 20      | /uL   | 0.0174  | 0 – 0       |
|                                               | Sodium       | 147 v. 141   | mEq/L | 0.0010  | 158 – 170   |
|                                               | Potassium    | 6.8 v. 9.2   | mEq/L | 0.0485  | 8.8 – 10.4  |

Abbreviations: BUN, blood urea nitrogen; RI, reference interval; T. Bilirubin, total bilirubin.

Figures below are to be left in reserve, just in case poster has room and/or needs more....

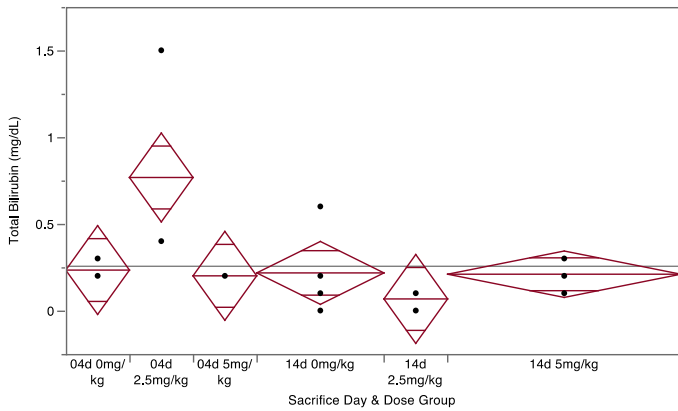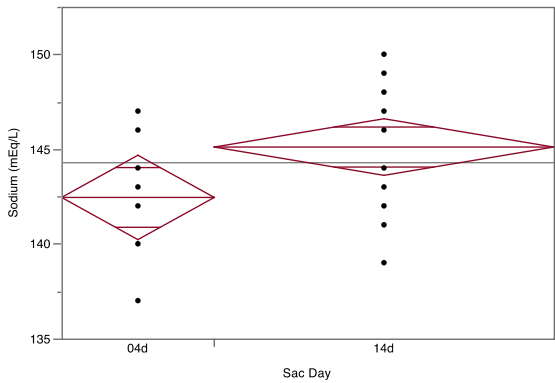

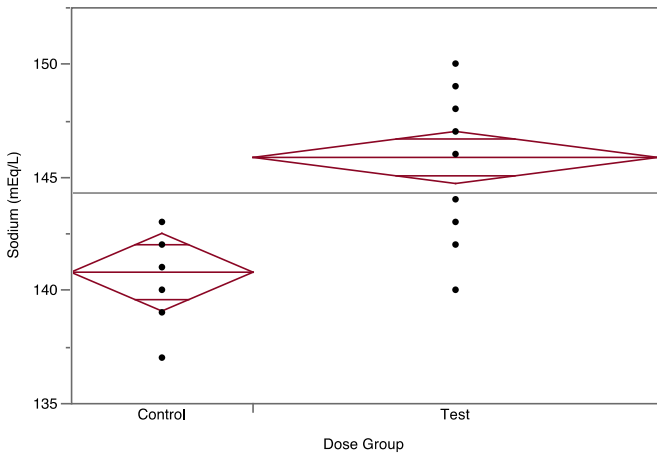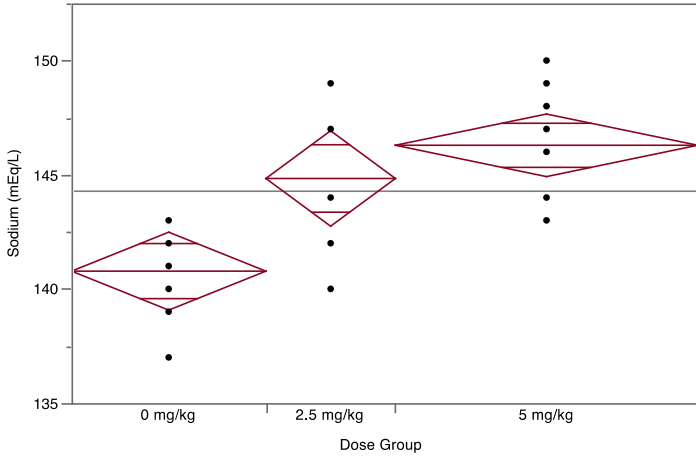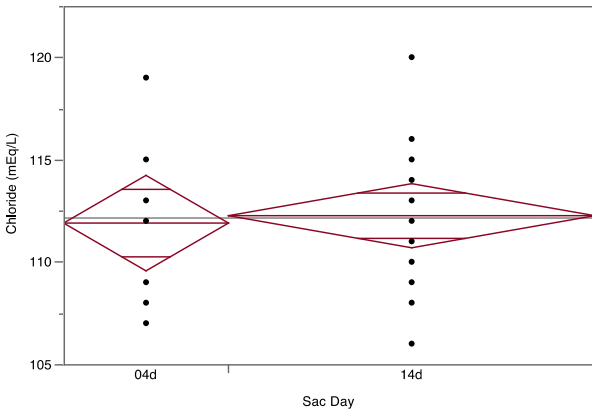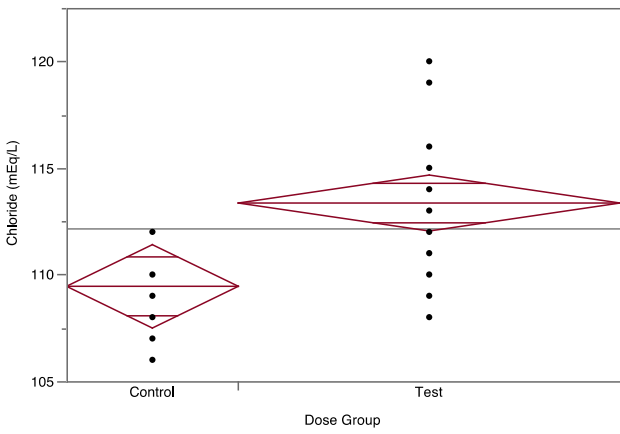

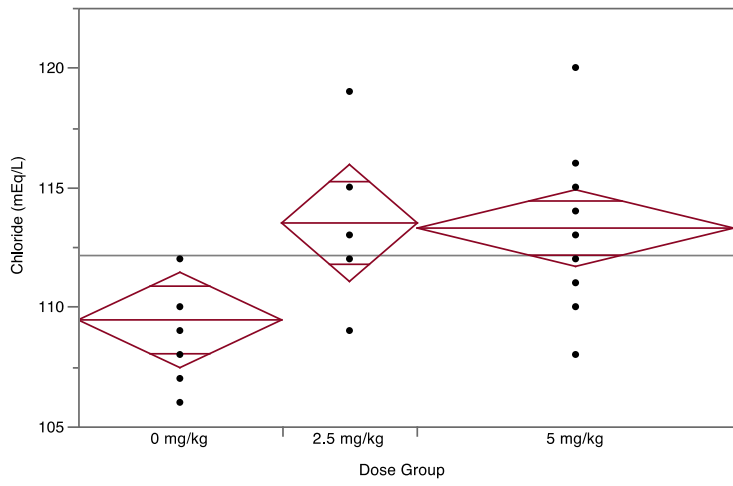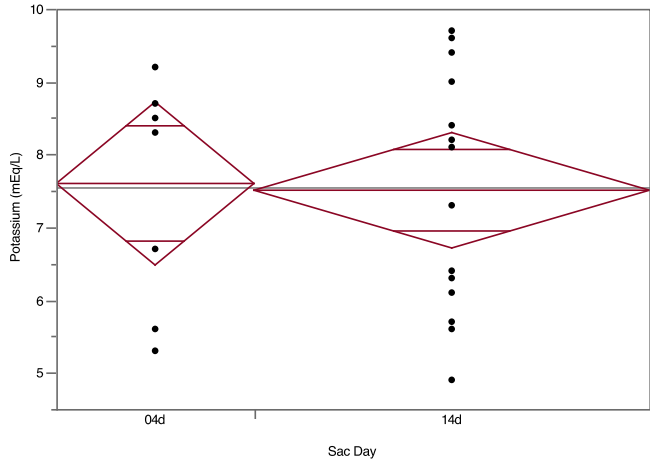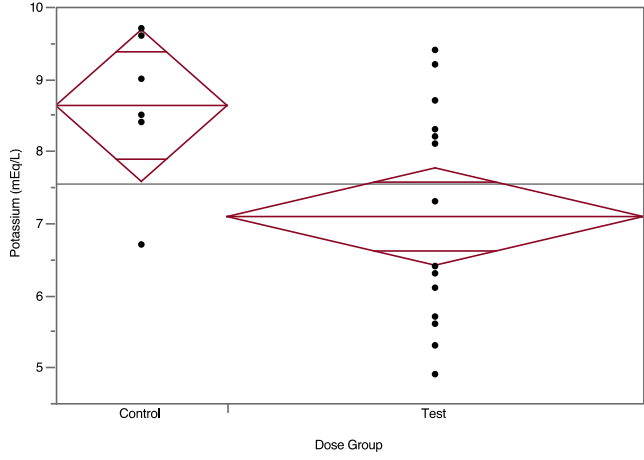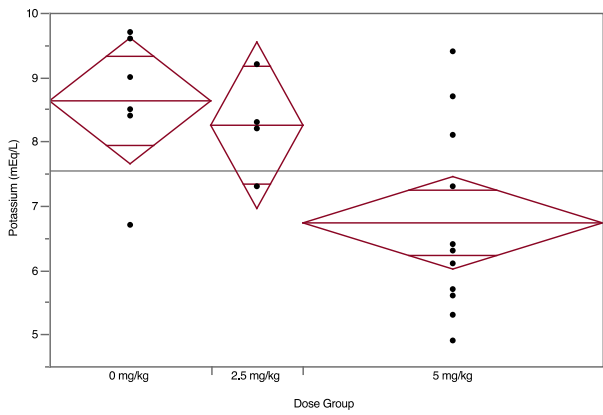

Entry 4S. PDF of Excel Spreadsheet of data behind Figure 8.

ICP concentration (ppm) for Blood and Organs in VT Mouse Toxicity Study

Numbers are not corrected for dilutions.

| Day | Urine |
|-----|-------|
| 0   | 0     |
| 14  | 1.05  |

  

| Day | Kidney |
|-----|--------|
| 0   | 0      |
| 4   | 1.05   |
| 14  | 0.22   |

  

| Day | Liver |
|-----|-------|
| 0   | 0     |
| 4   | 3.51  |
| 14  | 1.49  |

  

| Day | Blood |
|-----|-------|
| 0   | 0     |
| 1   | 3     |
| 4   | 0.12  |
| 14  | 0     |

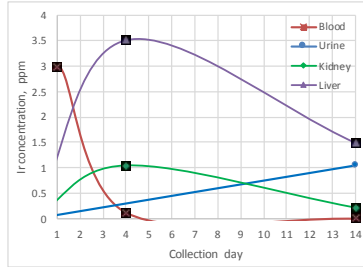

Entry 5S. PDF of Excel Spreadsheet of raw ICP data.

Raw data collected for mouse blood, urine and tissue samples for metal complex 1 safety study

Compound Tested @ 2.5 mg/kg

IrCl<sub>3</sub>·xH<sub>2</sub>O, 1,2-diaminocyclohexane  
2.5 mg/kg  
MIC 4 ug/mL

Mouse Size (average)  
40g

Blood Volume (average)  
3 mL

Avg amount given to mouse (average)  
100 ug

Average for the blood volume is 45 ug/mL of blood  
This is roughly 10X higher than the MIC needed to be therapeutic for a septic blood infection

| Iridium Blood Concentration | Day 1  | Day 4  | Day 14 |
|-----------------------------|--------|--------|--------|
| ppm                         | 1.12   | 0.12   | 0      |
|                             | 2.75   | 0.25   | 0      |
|                             | 1.65   | 0.12   | 0      |
|                             | 2.61   | 0.25   | 0      |
| Average                     | 1.8825 | 0.1975 | 0      |

  

| Corrected for dilution of 10mL | Day 1       | Day 4    | Day 14 |
|--------------------------------|-------------|----------|--------|
| ppm                            | 4.86666667  | 0.3      | 0      |
|                                | 11.45833333 | 1.041667 | 0      |
|                                | 6.875       | 0.768333 | 0      |
|                                | 8.175       | 1.041667 | 0      |
| Average                        | 7.84375     | 0.822917 | 0      |

| Day 14 Results (averages) | Concentration Ir detected |
|---------------------------|---------------------------|
| Urine                     | 0.211                     |
| Liver                     | 1.43                      |
| Blood                     | 0.000                     |
| Kidney                    | 1.051                     |

| PPM  | counts |
|------|--------|
| 1.43 | 140.3  |

| IR call name | PPM     | Signal |
|--------------|---------|--------|
| 19           | OR 2115 |        |
| 5            | 1325    |        |
| 1            | 245     |        |
| 0.5          | 120.3   |        |
| 0.05         | 9.33    |        |

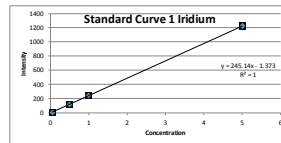

| Average | counts |
|---------|--------|
| Day 14  | 140.3  |
| Liver   |        |

| Iridium Calibration | PPM     | Signal |
|---------------------|---------|--------|
| 100                 | OR 3765 |        |
| 5                   | 765     |        |
| 1                   | 225.1   |        |
| 0.5                 | 145.3   |        |

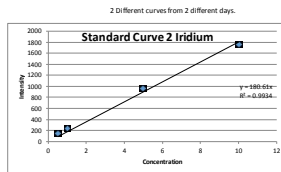

| PPM    | counts  |
|--------|---------|
| 0.222  | 40.5    |
| 0.200  | 37.5    |
| 0.211  | 39.5    |
| 0.2200 | 39.5    |
| 0.218  | 39.5    |
| Day 14 | 0.2152  |
| Urine  | 0.2185  |
|        | 0.2182  |
|        | 0.21875 |

avg

Entry 6S. Activation Energy Calculations for Conformation Change of

[Cp\*Ir(cis-1,2-diaminocyclohexane)Cl]<sup>+</sup>

Supplementary Information for

“Iridium Piano Stool Complexes with Activity Against *S. aureus* and MRSA: It is past time to truly think outside of the box.”

All calculations were performed using the WebMO interface, Version 17.0.012e.

The coordinates for the two conformers found in the crystal were input separately into WebMO<sup>1</sup> using the “Create New Job” command followed by the “Import Molecule” command. For each conformer, the geometry was optimized by the “Geometry Optimization & Vibrational Frequencies” command. These calculations were performed using Gaussian<sup>2</sup> at the B3LYP<sup>3</sup> level of theory with the lanl2dz basis set that covers many heavy elements, including iridium. These optimizations required from between 3 and 5 hrs of computation time on the server available.

In order to calculate possible transition states between the two conformers, the crystal-based structures were manipulated to provide multiple possible conformations along the ring-flip coordinate. This was done by taking a crystal conformer and deleting the cyclohexane ring. Then, different cyclohexane fragments (chair, boat, half-chair, twist-boat) that were available in the WebMO fragment library were added, and these various compounds with different conformations were subject to Transition State Optimization (TSO) followed by Vibrational Frequencies. The TSO calculations required from between 8 and 18 hrs to complete. For each TSO calculation, the different energies calculated were noted and shown in Table 1 below. For some starting points, the same possible transition state was obtained and are only entered once in the table. Because of the complexity of the system, the “perturbed” conformations for the TSO calculations had to be entered by hand – attempts at performing a “Saddle Calculation” failed.

The table lists the energy of the complex as a function of the Ir-N-C-H dihedral angle highlighted in the figure below. (This was arbitrarily chosen as an indicator of the conformer). Because there was no systematic way of varying and calculating that dihedral, the number of data points for possible transition states was limited by random generation of the optimized states and limited computational time. Nevertheless, samples of the computational space have no values greater than 10 kcal/mol in keeping with the similarities to decalin and cyclohexane.

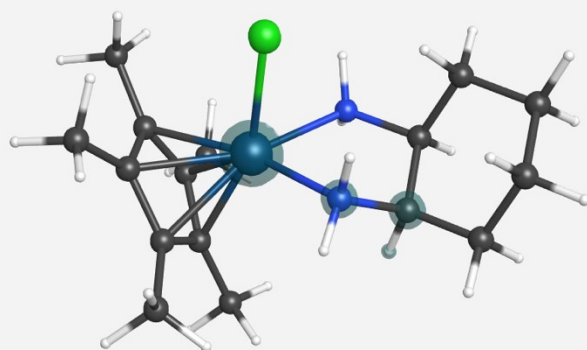

Table 1. Energy of conformer at various M-N-C-H dihedral angles

The conformer with the lowest energy corresponds to one from the crystal structure and shown in the paper as Figure 5. This was set as the 0 energy level. The other conformer shown in the paper as Figure 6 is only slightly higher in energy at +0.48 kcal/mol.

| M-N-C-H Dihedral Angle | Energy (kcal/mol) |
|------------------------|-------------------|
| -135                   | 5.08              |
| -75.1                  | 9.48              |
| -64.9                  | 5.10              |
| 79.8                   | 0.48              |
| 81.7                   | 9.90              |
| 157.4                  | 8.85              |
| 158.1                  | 0                 |
|                        |                   |

- Schmidt, J.R.; Polik, W.F. WebMO Enterprise, version 17.0.012e; WebMO LLC: Holland, MI, USA, 2016; <https://www.webmo.net> (accessed April, 2019)
- Gaussian 09, Revision A.02, M. J. Frisch, G. W. Trucks, H. B. Schlegel, G. E. Scuseria, M. A. Robb, J. R. Cheeseman, G. Scalmani, V. Barone, G. A. Petersson, H. Nakatsuji, X. Li, M. Caricato, A. Marenich, J. Bloino, B. G. Janesko, R. Gomperts, B. Mennucci, H. P. Hratchian, J. V. Ortiz, A. F. Izmaylov, J. L. Sonnenberg, D. Williams-Young, F. Ding, F. Lipparini, F. Egidi, J. Goings, B. Peng, A. Petrone, T. Henderson, D. Ranasinghe, V. G. Zakrzewski, J. Gao, N. Rega, G. Zheng, W. Liang, M. Hada, M. Ehara, K. Toyota, R. Fukuda, J. Hasegawa, M. Ishida, T. Nakajima, Y. Honda, O. Kitao, H. Nakai, T. Vreven, K. Throssell, J. A. Montgomery, Jr., J. E. Peralta, F. Ogliaro, M. Bearpark, J. J. Heyd, E. Brothers, K. N. Kudin, V. N. Staroverov, T. Keith, R. Kobayashi, J. Normand, K. Raghavachari, A. Rendell, J. C. Burant, S. S. Iyengar, J. Tomasi, M. Cossi, J. M. Millam, M. Klene, C. Adamo, R. Cammi, J. W. Ochterski, R. L. Martin, K. Morokuma, O. Farkas, J. B. Foresman, and D. J. Fox, Gaussian, Inc., Wallingford CT, 2016.
- a. A.D. Becke, J.Chem.Phys. 98 (1993) 5648-5652; b. C. Lee, W. Yang, R.G. Parr, Phys. Rev. B 37 (1988) 785-789
- P. J. Hay and W. R. Wadt, "Ab initio effective core potentials for molecular calculations – potentials for K to Au including the outermost core orbitals," J. Chem. Phys., 82(1985) 299-310. DOI: [10.1063/1.448975](https://doi.org/10.1063/1.448975)

## Entry 7S. Tables of Experimental Data and Bond Lengths and Angles form Compound 1. CCDC1901126

5/13/2019

DMMXI044A\_ABS

file:///Users/joemerola/Desktop/cisaminocyclohexane/DMMXI044A\_ABS\_tables.html

1/17

Table 1 Crystal data and structure refinement for DMMXI044A\_ABS.

|                                             |                                                                                  |
|---------------------------------------------|----------------------------------------------------------------------------------|
| Identification code                         | DMMXI044A_ABS                                                                    |
| Empirical formula                           | C <sub>32.5</sub> H <sub>59</sub> N <sub>4</sub> Cl <sub>5</sub> Ir <sub>2</sub> |
| Formula weight                              | 1067.48                                                                          |
| Temperature/K                               | 99.9                                                                             |
| Crystal system                              | monoclinic                                                                       |
| Space group                                 | P2 <sub>1</sub> /c                                                               |
| a/Å                                         | 25.3023(2)                                                                       |
| b/Å                                         | 14.75173(12)                                                                     |
| c/Å                                         | 20.32938(18)                                                                     |
| α/°                                         | 90                                                                               |
| β/°                                         | 93.8630(8)                                                                       |
| γ/°                                         | 90                                                                               |
| Volume/Å <sup>3</sup>                       | 7570.75(11)                                                                      |
| Z                                           | 8                                                                                |
| ρ <sub>calc</sub> /g/cm <sup>3</sup>        | 1.873                                                                            |
| μ/mm <sup>-1</sup>                          | 7.405                                                                            |
| F(000)                                      | 4168.0                                                                           |
| Crystal size/mm <sup>3</sup>                | 0.3461 × 0.0947 × 0.0664                                                         |
| Radiation                                   | MoKα (λ = 0.71073) 2θ                                                            |
| range for data collection/°                 | 6.956 to 64.946                                                                  |
| Index ranges                                | -38 ≤ h ≤ 38, -21 ≤ k ≤ 22, -30 ≤ l ≤ 29                                         |
| Reflections collected                       | 161024                                                                           |
| Independent reflections                     | 25813 [R <sub>int</sub> = 0.0659, R <sub>sigma</sub> = 0.0486]                   |
| Data/restraints/parameters                  | 25813/0/804                                                                      |
| Goodness-of-fit on F <sup>2</sup>           | 1.082                                                                            |
| Final R indexes [I ≥ 2σ (I)]                | R <sub>1</sub> = 0.0338, wR <sub>2</sub> = 0.0586                                |
| Final R indexes [all data]                  | R <sub>1</sub> = 0.0581, wR <sub>2</sub> = 0.0669                                |
| Largest diff. peak/hole / e Å <sup>-3</sup> | 2.31/-1.25                                                                       |

Table 2 Fractional Atomic Coordinates ( $\times 10^4$ ) and Equivalent Isotropic Displacement Parameters ( $\text{\AA}^2 \times 10^3$ ) for DMMXI044A\_ABS.  $U_{\text{eq}}$  is defined as 1/3 of the trace of the orthogonalised  $U_{ij}$  tensor.

| Atom | <i>x</i>     | <i>y</i>    | <i>z</i>    | U(eq)      |
|------|--------------|-------------|-------------|------------|
| Ir1  | 9468.0 (2)   | 4694.2 (2)  | 6806.8 (2)  | 13.43 (3)  |
| Cl1  | 8614.6 (4)   | 4485.6 (6)  | 7246.6 (5)  | 16.93 (18) |
| N1   | 9803.7 (14)  | 3898 (2)    | 7606.5 (17) | 17.9 (7)   |
| N2   | 9633.4 (13)  | 5707 (2)    | 7531.2 (17) | 18.3 (7)   |
| C1   | 9724.6 (18)  | 3899 (3)    | 5994 (2)    | 21.7 (9)   |
| C2   | 9187.7 (18)  | 4156 (3)    | 5863 (2)    | 22.8 (9)   |
| C3   | 9161.6 (18)  | 5142 (3)    | 5851 (2)    | 23.5 (9)   |
| C4   | 9688.8 (17)  | 5475 (3)    | 5971 (2)    | 21.6 (9)   |
| C5   | 10041.3 (17) | 4715 (3)    | 6080 (2)    | 20.4 (8)   |
| C6   | 9934 (2)     | 2947 (3)    | 6036 (2)    | 31.0 (11)  |
| C7   | 8724 (2)     | 3531 (3)    | 5758 (2)    | 32.3 (11)  |
| C8   | 8663.2 (19)  | 5684 (4)    | 5712 (2)    | 31.5 (11)  |
| C9   | 9844 (2)     | 6455 (3)    | 5990 (3)    | 30.9 (11)  |
| C10  | 10629.3 (19) | 4764 (4)    | 6195 (3)    | 33.3 (11)  |
| C11  | 9795.6 (16)  | 5354 (3)    | 8201 (2)    | 19.5 (8)   |
| C12  | 9331.0 (18)  | 5218 (3)    | 8619 (2)    | 23.9 (9)   |
| C13  | 9507 (2)     | 4776 (3)    | 9276 (2)    | 30.0 (10)  |
| C14  | 9789 (2)     | 3876 (3)    | 9168 (2)    | 33.4 (11)  |
| C15  | 10263.6 (18) | 4017 (3)    | 8747 (2)    | 28.2 (10)  |
| C16  | 10114.3 (16) | 4492 (3)    | 8102 (2)    | 20.7 (9)   |
| Ir2  | 7579.2 (2)   | 8504.7 (2)  | 3731.8 (2)  | 13.79 (3)  |
| Cl2  | 7825.1 (4)   | 10048.5 (6) | 3937.6 (5)  | 22.3 (2)   |
| N3   | 7020.4 (13)  | 9088 (2)    | 3009.4 (16) | 15.8 (7)   |
| N4   | 8048.0 (13)  | 8647 (2)    | 2908.0 (17) | 17.1 (7)   |
| C17  | 7620.5 (18)  | 8178 (3)    | 4779 (2)    | 21.7 (9)   |
| C18  | 7115.7 (16)  | 7906 (3)    | 4486 (2)    | 17.7 (8)   |
| C19  | 7205.9 (16)  | 7239 (3)    | 3980 (2)    | 16.4 (8)   |
| C20  | 7771.2 (16)  | 7111 (3)    | 3971 (2)    | 17.9 (8)   |
| C21  | 8033.3 (17)  | 7713 (3)    | 4452 (2)    | 20.9 (9)   |
| C22  | 7722 (2)     | 8843 (3)    | 5329 (2)    | 30.1 (11)  |
| C23  | 6585.3 (18)  | 8163 (3)    | 4701 (2)    | 25.2 (9)   |
| C24  | 6779.7 (16)  | 6728 (3)    | 3588 (2)    | 20.1 (8)   |
| C25  | 8037.2 (17)  | 6446 (3)    | 3553 (2)    | 24.0 (9)   |
| C26  | 8619.3 (17)  | 7796 (3)    | 4611 (3)    | 29.2 (11)  |
| C27  | 7273.7 (15)  | 9384 (3)    | 2399 (2)    | 15.7 (8)   |
| C28  | 6885.2 (17)  | 9464 (3)    | 1792 (2)    | 19.4 (8)   |
| C29  | 6696.4 (16)  | 8542 (3)    | 1522 (2)    | 19.8 (8)   |
| C30  | 7159.5 (17)  | 7914 (3)    | 1407 (2)    | 20.3 (8)   |
| C31  | 7516.8 (16)  | 7799 (3)    | 2043 (2)    | 17.7 (8)   |
| C32  | 7719.3 (15)  | 8719 (3)    | 2277 (2)    | 15.0 (7)   |
| Ir3  | 4585.5 (2)   | 6335.5 (2)  | 1898.6 (2)  | 12.55 (3)  |
| Cl3  | 3648.1 (4)   | 6147.3 (7)  | 2067.2 (5)  | 20.0 (2)   |
| N5   | 4734.8 (13)  | 5375 (2)    | 2675.9 (16) | 17.2 (7)   |
| N6   | 4617.7 (14)  | 7199 (2)    | 2738.7 (17) | 18.2 (7)   |



|      |             |             |             |            |
|------|-------------|-------------|-------------|------------|
| C33  | 4986.6 (16) | 5635 (3)    | 1149 (2)    | 17.5 (8)   |
| C34  | 4468.0 (16) | 5904 (3)    | 891 (2)     | 18.1 (8)   |
| C35  | 4441.4 (17) | 6892 (3)    | 930 (2)     | 18.6 (8)   |
| C36  | 4942.1 (16) | 7218 (3)    | 1199 (2)    | 16.1 (8)   |
| C37  | 5281.1 (16) | 6448 (3)    | 1366 (2)    | 17.3 (8)   |
| C38  | 5176.7 (17) | 4679 (3)    | 1185 (2)    | 22.1 (9)   |
| C39  | 4047.5 (17) | 5257 (3)    | 646 (2)     | 23.8 (9)   |
| C40  | 3970.6 (17) | 7459 (3)    | 716 (2)     | 25.3 (9)   |
| C41  | 5096.3 (17) | 8185 (3)    | 1291 (2)    | 20.6 (8)   |
| C42  | 5848.5 (16) | 6465 (3)    | 1628 (2)    | 23.7 (9)   |
| C43  | 4447.4 (17) | 6681 (3)    | 3324 (2)    | 21.3 (9)   |
| C44  | 4508.1 (19) | 7203 (3)    | 3971 (2)    | 25.8 (10)  |
| C45  | 5077.2 (19) | 7303 (3)    | 4247 (2)    | 26.3 (10)  |
| C46  | 5356 (2)    | 6389 (3)    | 4283 (2)    | 28.2 (10)  |
| C47  | 5329.7 (18) | 5932 (3)    | 3606 (2)    | 23.6 (9)   |
| C48  | 4759.1 (17) | 5786 (3)    | 3353 (2)    | 20.4 (8)   |
| Ir4  | 2449.0 (2)  | 8289.9 (2)  | 3268.6 (2)  | 12.36 (3)  |
| Cl4  | 2709.0 (4)  | 6789.6 (7)  | 3618.2 (5)  | 22.0 (2)   |
| N7   | 2914.5 (13) | 7998 (2)    | 2462.0 (17) | 15.8 (7)   |
| N8   | 1898.2 (13) | 7589 (2)    | 2617.1 (17) | 15.7 (7)   |
| C49  | 2061.8 (15) | 9590 (3)    | 3387 (2)    | 16.7 (8)   |
| C50  | 1989.7 (16) | 9035 (3)    | 3959 (2)    | 16.7 (8)   |
| C51  | 2498.5 (16) | 8825 (3)    | 4266 (2)    | 16.5 (8)   |
| C52  | 2897.2 (15) | 9233 (3)    | 3886 (2)    | 16.0 (8)   |
| C53  | 2620.1 (15) | 9722 (2)    | 3350 (2)    | 14.5 (7)   |
| C54  | 2878.8 (16) | 10305 (3)   | 2867 (2)    | 17.9 (8)   |
| C55  | 1626.2 (16) | 10028 (3)   | 2967 (2)    | 20.6 (9)   |
| C56  | 1460.9 (18) | 8848 (3)    | 4232 (2)    | 26.6 (10)  |
| C57  | 2609 (2)    | 8269 (3)    | 4875 (2)    | 26.3 (10)  |
| C58  | 3480.1 (16) | 9230 (3)    | 4024 (2)    | 21.1 (9)   |
| C59  | 2575.4 (16) | 7882 (3)    | 1842 (2)    | 16.3 (8)   |
| C60  | 2374.9 (17) | 8796 (3)    | 1575 (2)    | 19.2 (8)   |
| C61  | 1986.7 (17) | 8677 (3)    | 974 (2)     | 21.4 (9)   |
| C62  | 1520.6 (17) | 8090 (3)    | 1159 (2)    | 21.5 (9)   |
| C63  | 1709.8 (16) | 7168 (3)    | 1424 (2)    | 19.4 (8)   |
| C64  | 2125.2 (15) | 7245 (3)    | 1998 (2)    | 15.3 (7)   |
| Cl5  | 9035.3 (4)  | 7664.5 (7)  | 7530.6 (7)  | 29.2 (3)   |
| Cl6  | 4206.7 (4)  | 3394.7 (7)  | 2090.0 (5)  | 19.57 (19) |
| Cl7  | 5989.2 (4)  | 4104.7 (7)  | 2729.6 (6)  | 23.1 (2)   |
| Cl8  | 690.8 (4)   | 8158.8 (7)  | 2545.9 (6)  | 23.5 (2)   |
| Cl9  | 6173.8 (6)  | 4788.8 (10) | 5112.4 (8)  | 46.5 (3)   |
| Cl10 | 7276.1 (5)  | 5300.9 (9)  | 4970.7 (6)  | 36.7 (3)   |
| C65  | 6804 (2)    | 4411 (3)    | 4946 (3)    | 34.1 (12)  |

Table 3 Anisotropic Displacement Parameters ( $\text{\AA}^2 \times 10^3$ ) for DMMXI044A\_ABS. The Anisotropic displacement factor exponent takes the form:

$$-2\pi^2[h^2a^2U_{11}+2hka*b*U_{12}+...].$$

| Atom | $U_{11}$  | $U_{22}$  | $U_{33}$  | $U_{23}$  | $U_{13}$  | $U_{12}$  |
|------|-----------|-----------|-----------|-----------|-----------|-----------|
| Ir1  | 14.57 (7) | 10.65 (6) | 15.13 (7) | 0.30 (5)  | 1.52 (5)  | -1.09 (5) |
| Cl1  | 13.8 (4)  | 14.5 (4)  | 22.5 (5)  | 0.5 (4)   | 1.3 (4)   | -0.7 (3)  |
| N1   | 19.7 (17) | 14.9 (16) | 19.2 (18) | 1.6 (13)  | 2.0 (14)  | 2.9 (13)  |
| N2   | 16.7 (16) | 13.3 (16) | 25.0 (19) | -2.0 (13) | 2.1 (14)  | 1.5 (13)  |
| C1   | 31 (2)    | 18 (2)    | 17 (2)    | -2.5 (16) | 9.0 (18)  | 0.6 (17)  |
| C2   | 32 (2)    | 24 (2)    | 12.2 (19) | -1.9 (16) | -0.9 (17) | -3.6 (18) |
| C3   | 30 (2)    | 23 (2)    | 17 (2)    | 3.8 (17)  | 0.6 (18)  | 3.5 (18)  |
| C4   | 26 (2)    | 17 (2)    | 22 (2)    | 3.1 (16)  | 4.3 (18)  | -3.8 (17) |
| C5   | 21 (2)    | 21 (2)    | 20 (2)    | 1.6 (17)  | 7.8 (16)  | -1.4 (16) |
| C6   | 45 (3)    | 22 (2)    | 26 (2)    | -2.2 (19) | 12 (2)    | 4 (2)     |
| C7   | 42 (3)    | 34 (3)    | 20 (2)    | -6 (2)    | -4 (2)    | -12 (2)   |
| C8   | 32 (3)    | 38 (3)    | 24 (2)    | 10 (2)    | -4 (2)    | 7 (2)     |
| C9   | 37 (3)    | 18 (2)    | 38 (3)    | 8 (2)     | 7 (2)     | -8 (2)    |
| C10  | 30 (3)    | 38 (3)    | 33 (3)    | 3 (2)     | 14 (2)    | -1 (2)    |
| C11  | 20.4 (19) | 16.8 (19) | 21 (2)    | -0.7 (16) | -2.4 (16) | -2.0 (16) |
| C12  | 26 (2)    | 26 (2)    | 20 (2)    | 0.8 (18)  | 3.1 (18)  | 3.7 (18)  |
| C13  | 38 (3)    | 34 (3)    | 18 (2)    | 2.2 (19)  | 2 (2)     | 4 (2)     |
| C14  | 40 (3)    | 33 (3)    | 26 (3)    | 0 (2)     | -8 (2)    | -4 (2)    |
| C15  | 25 (2)    | 19 (2)    | 38 (3)    | 1.8 (19)  | -11 (2)   | 0.9 (18)  |
| C16  | 17.2 (19) | 16.0 (19) | 28 (2)    | 0.3 (17)  | -3.0 (17) | -0.6 (15) |
| Ir2  | 15.93 (7) | 9.14 (6)  | 16.45 (7) | -0.93 (5) | 2.11 (5)  | -0.66 (5) |
| Cl2  | 33.1 (6)  | 11.7 (4)  | 22.5 (5)  | -2.9 (4)  | 4.1 (4)   | -5.7 (4)  |
| N3   | 18.9 (16) | 12.3 (15) | 16.5 (16) | -3.1 (13) | 3.0 (13)  | -1.5 (13) |
| N4   | 16.4 (16) | 11.9 (15) | 23.1 (18) | -4.0 (13) | 0.9 (14)  | 0.9 (12)  |
| C17  | 30 (2)    | 14.6 (19) | 20 (2)    | 3.7 (16)  | 0.2 (18)  | -3.6 (17) |
| C18  | 24 (2)    | 12.3 (18) | 18 (2)    | 3.5 (15)  | 4.1 (16)  | 0.2 (15)  |
| C19  | 19.2 (19) | 9.5 (17)  | 21 (2)    | 2.8 (15)  | 2.9 (16)  | -1.5 (14) |
| C20  | 18.4 (19) | 8.1 (17)  | 27 (2)    | 1.9 (15)  | 2.3 (17)  | -0.9 (14) |
| C21  | 22 (2)    | 18 (2)    | 23 (2)    | 7.2 (16)  | -1.2 (17) | -3.4 (16) |
| C22  | 49 (3)    | 24 (2)    | 17 (2)    | -1.6 (18) | 1 (2)     | -7 (2)    |
| C23  | 30 (2)    | 22 (2)    | 25 (2)    | 1.6 (18)  | 12.1 (19) | 4.6 (18)  |
| C24  | 20 (2)    | 16.3 (19) | 24 (2)    | -1.2 (16) | 1.9 (17)  | -0.9 (16) |
| C25  | 22 (2)    | 13.7 (19) | 38 (3)    | 0.7 (18)  | 12.2 (19) | 4.0 (16)  |
| C26  | 21 (2)    | 26 (2)    | 38 (3)    | 13 (2)    | -12 (2)   | -5.5 (18) |
| C27  | 16.9 (18) | 12.0 (17) | 19 (2)    | 0.3 (14)  | 2.7 (15)  | 1.5 (14)  |
| C28  | 21 (2)    | 17.7 (19) | 19 (2)    | 0.2 (16)  | 1.3 (16)  | -0.7 (16) |
| C29  | 20 (2)    | 20 (2)    | 18 (2)    | -0.6 (16) | -1.1 (16) | -3.9 (16) |
| C30  | 25 (2)    | 14.0 (19) | 22 (2)    | -6.2 (16) | 5.5 (17)  | -2.2 (16) |
| C31  | 19.8 (19) | 14.8 (18) | 19 (2)    | -3.6 (15) | 3.9 (16)  | -2.4 (15) |
| C32  | 15.2 (17) | 11.4 (17) | 18.8 (19) | -0.3 (14) | 3.8 (15)  | -1.7 (14) |
| Ir3  | 11.74 (6) | 10.74 (6) | 15.39 (7) | 0.12 (5)  | 2.55 (5)  | -0.47 (5) |
| Cl3  | 14.2 (4)  | 15.5 (4)  | 31.0 (6)  | 0.7 (4)   | 6.7 (4)   | 0.0 (3)   |
| N5   | 17.7 (16) | 15.1 (16) | 19.1 (17) | 0.3 (13)  | 3.7 (13)  | -0.3 (13) |
| N6   | 19.2 (16) | 12.8 (16) | 22.8 (18) | 0.5 (13)  | 3.0 (14)  | -0.1 (13) |

|      |          |          |          |          |          |          |
|------|----------|----------|----------|----------|----------|----------|
| C33  | 19.3(19) | 16.5(19) | 18(2)    | -0.9(15) | 8.7(16)  | 1.1(15)  |
| C34  | 21(2)    | 20(2)    | 13.3(19) | -0.8(15) | 0.9(16)  | -1.3(16) |
| C35  | 25(2)    | 16.2(19) | 14.9(19) | 1.8(15)  | 2.2(16)  | -0.6(16) |
| C36  | 22.3(19) | 11.1(17) | 15.6(19) | 0.9(14)  | 6.0(16)  | -1.0(15) |
| C37  | 17.7(18) | 13.0(18) | 22(2)    | -0.2(15) | 5.7(16)  | 0.2(15)  |
| C38  | 22(2)    | 14.5(19) | 31(2)    | -0.5(17) | 7.8(18)  | 0.7(16)  |
| C39  | 21(2)    | 25(2)    | 25(2)    | -2.9(18) | -1.4(18) | -6.2(17) |
| C40  | 24(2)    | 26(2)    | 26(2)    | 7.3(18)  | -2.7(18) | 4.1(18)  |
| C41  | 22(2)    | 14.3(19) | 26(2)    | 2.6(16)  | 5.9(17)  | -1.6(16) |
| C42  | 14.9(18) | 17(2)    | 40(3)    | -3.3(18) | 6.5(18)  | -1.5(16) |
| C43  | 22(2)    | 19(2)    | 23(2)    | 1.2(17)  | 2.6(17)  | -2.6(16) |
| C44  | 35(2)    | 18(2)    | 26(2)    | -3.5(17) | 11(2)    | 0.9(18)  |
| C45  | 39(3)    | 21(2)    | 18(2)    | 1.2(17)  | 3.3(19)  | 1.5(19)  |
| C46  | 37(3)    | 23(2)    | 24(2)    | 2.1(18)  | -4(2)    | 2(2)     |
| C47  | 28(2)    | 19(2)    | 23(2)    | -1.7(17) | -2.4(18) | 4.9(17)  |
| C48  | 27(2)    | 13.3(19) | 21(2)    | 1.8(16)  | 1.9(17)  | -0.5(16) |
| Ir4  | 12.61(6) | 9.00(6)  | 15.74(7) | -0.17(5) | 2.93(5)  | 0.74(5)  |
| Cl4  | 28.0(5)  | 12.8(4)  | 24.7(5)  | 2.4(4)   | -1.7(4)  | 6.0(4)   |
| N7   | 13.4(15) | 13.8(15) | 20.7(17) | -0.7(13) | 4.4(13)  | -1.5(12) |
| N8   | 16.0(15) | 12.1(15) | 19.8(17) | 2.7(13)  | 6.1(13)  | 1.6(12)  |
| C49  | 16.4(18) | 11.1(17) | 23(2)    | -1.2(15) | 6.3(16)  | 2.9(14)  |
| C50  | 18.3(18) | 12.8(18) | 20(2)    | -3.9(15) | 6.8(16)  | 0.1(15)  |
| C51  | 19.4(19) | 13.5(18) | 16.8(19) | -3.6(15) | 2.9(15)  | 0.4(15)  |
| C52  | 16.6(18) | 14.1(18) | 17.4(19) | -4.0(15) | 1.8(15)  | -0.5(14) |
| C53  | 16.1(17) | 7.5(16)  | 20(2)    | -1.4(14) | 3.8(15)  | 0.7(14)  |
| C54  | 18.8(19) | 12.3(18) | 23(2)    | 2.1(15)  | 1.7(16)  | -0.8(15) |
| C55  | 19.4(19) | 12.9(18) | 29(2)    | -0.5(16) | 0.0(17)  | 1.9(15)  |
| C56  | 24(2)    | 21(2)    | 37(3)    | -3.6(19) | 18(2)    | -2.5(17) |
| C57  | 37(3)    | 25(2)    | 17(2)    | -0.4(18) | 6.7(19)  | 1(2)     |
| C58  | 22(2)    | 23(2)    | 18(2)    | -1.6(17) | -3.1(17) | -1.2(17) |
| C59  | 18.4(18) | 13.9(18) | 18(2)    | -4.0(15) | 7.8(16)  | 0.3(15)  |
| C60  | 27(2)    | 10.0(17) | 21(2)    | -0.1(15) | 7.5(17)  | -2.1(15) |
| C61  | 29(2)    | 16.2(19) | 19(2)    | 0.0(16)  | 6.0(18)  | 1.2(17)  |
| C62  | 27(2)    | 22(2)    | 16(2)    | -2.4(16) | -0.9(17) | 4.3(17)  |
| C63  | 22(2)    | 16.6(19) | 20(2)    | 0.4(16)  | 2.4(17)  | -2.8(16) |
| C64  | 17.0(18) | 10.0(17) | 19(2)    | 0.6(14)  | 2.1(15)  | 1.6(14)  |
| Cl5  | 19.5(5)  | 17.6(5)  | 51.8(8)  | 1.7(5)   | 11.9(5)  | 0.1(4)   |
| Cl6  | 15.7(4)  | 19.6(5)  | 23.4(5)  | 1.4(4)   | 2.0(4)   | -0.2(4)  |
| Cl7  | 19.7(5)  | 18.0(5)  | 32.6(6)  | -0.2(4)  | 9.5(4)   | -0.2(4)  |
| Cl8  | 15.5(4)  | 19.9(5)  | 35.2(6)  | 2.7(4)   | 3.0(4)   | 2.6(4)   |
| Cl9  | 35.5(7)  | 38.1(7)  | 66.2(10) | -6.8(7)  | 6.2(7)   | -1.4(6)  |
| Cl10 | 37.1(7)  | 41.2(7)  | 32.4(7)  | -0.5(5)  | 6.2(5)   | -5.9(6)  |
| C65  | 33(3)    | 29(3)    | 42(3)    | 2(2)     | 11(2)    | -4(2)    |

Table 4 Bond Lengths for DMMXI044A\_ABS.

| Atom | Atom | Length/Å    | Atom | Atom | Length/Å    |
|------|------|-------------|------|------|-------------|
| Ir1  | Cl1  | 2.4116 (9)  | Ir3  | N5   | 2.137 (3)   |
| Ir1  | N1   | 2.135 (3)   | Ir3  | N6   | 2.128 (3)   |
| Ir1  | N2   | 2.120 (3)   | Ir3  | C33  | 2.152 (4)   |
| Ir1  | C1   | 2.161 (4)   | Ir3  | C34  | 2.146 (4)   |
| Ir1  | C2   | 2.152 (4)   | Ir3  | C35  | 2.141 (4)   |
| Ir1  | C3   | 2.147 (4)   | Ir3  | C36  | 2.170 (4)   |
| Ir1  | C4   | 2.157 (4)   | Ir3  | C37  | 2.135 (4)   |
| Ir1  | C5   | 2.140 (4)   | N5   | C48  | 1.502 (5)   |
| N1   | C16  | 1.514 (5)   | N6   | C43  | 1.501 (5)   |
| N2   | C11  | 1.489 (5)   | C33  | C34  | 1.435 (6)   |
| C1   | C2   | 1.418 (6)   | C33  | C37  | 1.464 (6)   |
| C1   | C5   | 1.450 (6)   | C33  | C38  | 1.490 (6)   |
| C1   | C6   | 1.502 (6)   | C34  | C35  | 1.462 (6)   |
| C2   | C3   | 1.456 (6)   | C34  | C39  | 1.489 (6)   |
| C2   | C7   | 1.497 (6)   | C35  | C36  | 1.429 (6)   |
| C3   | C4   | 1.427 (6)   | C35  | C40  | 1.496 (6)   |
| C3   | C8   | 1.504 (6)   | C36  | C37  | 1.450 (5)   |
| C4   | C5   | 1.441 (6)   | C36  | C41  | 1.486 (5)   |
| C4   | C9   | 1.498 (6)   | C37  | C42  | 1.498 (6)   |
| C5   | C10  | 1.492 (6)   | C43  | C44  | 1.523 (6)   |
| C11  | C12  | 1.510 (6)   | C43  | C48  | 1.537 (6)   |
| C11  | C16  | 1.526 (6)   | C44  | C45  | 1.517 (7)   |
| C12  | C13  | 1.524 (6)   | C45  | C46  | 1.522 (6)   |
| C13  | C14  | 1.530 (7)   | C46  | C47  | 1.529 (6)   |
| C14  | C15  | 1.535 (7)   | C47  | C48  | 1.515 (6)   |
| C15  | C16  | 1.512 (6)   | Ir4  | Cl4  | 2.4027 (10) |
| Ir2  | Cl2  | 2.3902 (10) | Ir4  | N7   | 2.126 (3)   |
| Ir2  | N3   | 2.148 (3)   | Ir4  | N8   | 2.125 (3)   |
| Ir2  | N4   | 2.127 (3)   | Ir4  | C49  | 2.175 (4)   |
| Ir2  | C17  | 2.178 (4)   | Ir4  | C50  | 2.180 (4)   |
| Ir2  | C18  | 2.180 (4)   | Ir4  | C51  | 2.171 (4)   |
| Ir2  | C19  | 2.168 (4)   | Ir4  | C52  | 2.145 (4)   |
| Ir2  | C20  | 2.160 (4)   | Ir4  | C53  | 2.160 (4)   |
| Ir2  | C21  | 2.144 (4)   | N7   | C59  | 1.487 (5)   |
| N3   | C27  | 1.499 (5)   | N8   | C64  | 1.506 (5)   |
| N4   | C32  | 1.485 (5)   | C49  | C50  | 1.446 (6)   |
| C17  | C18  | 1.429 (6)   | C49  | C53  | 1.432 (5)   |
| C17  | C21  | 1.448 (6)   | C49  | C55  | 1.494 (6)   |
| C17  | C22  | 1.498 (6)   | C50  | C51  | 1.426 (6)   |
| C18  | C19  | 1.454 (6)   | C50  | C56  | 1.508 (5)   |
| C18  | C23  | 1.488 (6)   | C51  | C52  | 1.443 (5)   |
| C19  | C20  | 1.444 (6)   | C51  | C57  | 1.496 (6)   |
| C19  | C24  | 1.499 (6)   | C52  | C53  | 1.447 (6)   |
| C20  | C21  | 1.448 (6)   | C52  | C58  | 1.483 (6)   |
| C20  | C25  | 1.488 (6)   | C53  | C54  | 1.490 (5)   |
| C21  | C26  | 1.501 (6)   | C59  | C60  | 1.526 (6)   |
| C27  | C28  | 1.529 (6)   | C59  | C64  | 1.527 (5)   |

|     |     |            |      |     |           |
|-----|-----|------------|------|-----|-----------|
| C27 | C32 | 1.527 (5)  | C60  | C61 | 1.525 (6) |
| C28 | C29 | 1.531 (6)  | C61  | C62 | 1.530 (6) |
| C29 | C30 | 1.524 (6)  | C62  | C63 | 1.527 (6) |
| C30 | C31 | 1.537 (6)  | C63  | C64 | 1.521 (6) |
| C31 | C32 | 1.516 (5)  | Cl9  | C65 | 1.745 (5) |
| Ir3 | Cl3 | 2.4350 (9) | Cl10 | C65 | 1.773 (5) |

file:///Users/joemerola/Desktop/cisaminocyclohexane/DMMXI044A\_ABS\_tables.html

7/17

Table 5 Bond Angles for DMMXI044A\_ABS.

| Atom | Atom | Atom | Angle/°     | Atom | Atom | Atom | Angle/°     |
|------|------|------|-------------|------|------|------|-------------|
| N1   | Ir1  | Cl1  | 88.15 (10)  | N5   | Ir3  | C33  | 97.89 (14)  |
| N1   | Ir1  | C1   | 99.13 (15)  | N5   | Ir3  | C34  | 120.99 (14) |
| N1   | Ir1  | C2   | 124.48 (15) | N5   | Ir3  | C35  | 160.84 (14) |
| N1   | Ir1  | C3   | 163.57 (15) | N5   | Ir3  | C36  | 145.31 (14) |
| N1   | Ir1  | C4   | 141.50 (15) | N6   | Ir3  | Cl3  | 86.58 (10)  |
| N1   | Ir1  | C5   | 106.29 (15) | N6   | Ir3  | N5   | 78.93 (13)  |
| N2   | Ir1  | Cl1  | 88.41 (10)  | N6   | Ir3  | C33  | 149.51 (15) |
| N2   | Ir1  | N1   | 79.00 (13)  | N6   | Ir3  | C34  | 159.89 (14) |
| N2   | Ir1  | C1   | 149.11 (15) | N6   | Ir3  | C35  | 120.23 (14) |
| N2   | Ir1  | C2   | 156.52 (15) | N6   | Ir3  | C36  | 99.90 (14)  |
| N2   | Ir1  | C3   | 117.02 (15) | N6   | Ir3  | C37  | 111.88 (14) |
| N2   | Ir1  | C4   | 96.93 (15)  | C33  | Ir3  | Cl3  | 123.74 (11) |
| N2   | Ir1  | C5   | 111.01 (15) | C33  | Ir3  | C36  | 65.60 (15)  |
| C1   | Ir1  | Cl1  | 122.46 (12) | C34  | Ir3  | Cl3  | 91.54 (11)  |
| C2   | Ir1  | Cl1  | 91.95 (12)  | C34  | Ir3  | C33  | 39.01 (15)  |
| C2   | Ir1  | C1   | 38.39 (17)  | C34  | Ir3  | C36  | 65.77 (15)  |
| C2   | Ir1  | C4   | 65.32 (17)  | C35  | Ir3  | Cl3  | 93.79 (12)  |
| C3   | Ir1  | Cl1  | 95.57 (13)  | C35  | Ir3  | C33  | 65.91 (16)  |
| C3   | Ir1  | C1   | 65.41 (17)  | C35  | Ir3  | C34  | 39.87 (15)  |
| C3   | Ir1  | C2   | 39.59 (16)  | C35  | Ir3  | C36  | 38.71 (15)  |
| C3   | Ir1  | C4   | 38.74 (17)  | C36  | Ir3  | Cl3  | 127.79 (11) |
| C4   | Ir1  | Cl1  | 130.24 (12) | C37  | Ir3  | Cl3  | 157.61 (12) |
| C4   | Ir1  | C1   | 65.24 (16)  | C37  | Ir3  | N5   | 108.42 (14) |
| C5   | Ir1  | Cl1  | 157.42 (12) | C37  | Ir3  | C33  | 39.94 (15)  |
| C5   | Ir1  | C1   | 39.39 (16)  | C37  | Ir3  | C34  | 66.71 (16)  |
| C5   | Ir1  | C2   | 65.63 (17)  | C37  | Ir3  | C35  | 66.34 (16)  |
| C5   | Ir1  | C3   | 65.83 (17)  | C37  | Ir3  | C36  | 39.37 (15)  |
| C5   | Ir1  | C4   | 39.19 (16)  | C48  | N5   | Ir3  | 113.9 (2)   |
| Cl6  | N1   | Ir1  | 110.5 (2)   | C43  | N6   | Ir3  | 109.5 (2)   |
| Cl11 | N2   | Ir1  | 114.7 (2)   | C34  | C33  | Ir3  | 70.3 (2)    |
| C2   | C1   | Ir1  | 70.4 (2)    | C34  | C33  | C37  | 108.6 (3)   |
| C2   | C1   | C5   | 108.4 (4)   | C34  | C33  | C38  | 124.3 (4)   |
| C2   | C1   | C6   | 126.2 (4)   | C37  | C33  | Ir3  | 69.4 (2)    |

|    |    |     |           |     |     |     |           |
|----|----|-----|-----------|-----|-----|-----|-----------|
| C5 | C1 | Ir1 | 69.5 (2)  | C37 | C33 | C38 | 127.2 (4) |
| C5 | C1 | C6  | 125.4 (4) | C38 | C33 | Ir3 | 125.8 (3) |
| C6 | C1 | Ir1 | 126.0 (3) | C33 | C34 | Ir3 | 70.7 (2)  |
| C1 | C2 | Ir1 | 71.2 (2)  | C33 | C34 | C35 | 107.4 (4) |
| C1 | C2 | C3  | 108.2 (4) | C33 | C34 | C39 | 124.1 (4) |
| C1 | C2 | C7  | 126.5 (4) | C35 | C34 | Ir3 | 69.9 (2)  |
| C3 | C2 | Ir1 | 70.0 (2)  | C35 | C34 | C39 | 128.5 (4) |
| C3 | C2 | C7  | 125.4 (4) | C39 | C34 | Ir3 | 124.0 (3) |
| C7 | C2 | Ir1 | 124.2 (3) | C34 | C35 | Ir3 | 70.2 (2)  |
| C2 | C3 | Ir1 | 70.4 (2)  | C34 | C35 | C40 | 125.5 (4) |
| C2 | C3 | C8  | 124.8 (4) | C36 | C35 | Ir3 | 71.7 (2)  |
| C4 | C3 | Ir1 | 71.0 (3)  | C36 | C35 | C34 | 108.3 (4) |
| C4 | C3 | C2  | 107.5 (4) | C36 | C35 | C40 | 126.2 (4) |
| C4 | C3 | C8  | 127.6 (4) | C40 | C35 | Ir3 | 124.4 (3) |

file:///Users/joemerola/Desktop/cisaminocyclohexane/DMMXI044A\_ABS\_tables.html

8/17

5/13/2019

DMMXI044A\_ABS

|     |     |     |             |     |     |     |             |
|-----|-----|-----|-------------|-----|-----|-----|-------------|
| C8  | C3  | Ir1 | 125.5 (3)   | C35 | C36 | Ir3 | 69.6 (2)    |
| C3  | C4  | Ir1 | 70.2 (2)    | C35 | C36 | C37 | 108.7 (3)   |
| C3  | C4  | C5  | 108.6 (4)   | C35 | C36 | C41 | 126.1 (4)   |
| C3  | C4  | C9  | 125.3 (4)   | C37 | C36 | Ir3 | 69.0 (2)    |
| C5  | C4  | Ir1 | 69.8 (2)    | C37 | C36 | C41 | 125.2 (4)   |
| C5  | C4  | C9  | 126.1 (4)   | C41 | C36 | Ir3 | 127.6 (3)   |
| C9  | C4  | Ir1 | 125.3 (3)   | C33 | C37 | Ir3 | 70.7 (2)    |
| C1  | C5  | Ir1 | 71.1 (2)    | C33 | C37 | C42 | 125.3 (4)   |
| C1  | C5  | C10 | 126.6 (4)   | C36 | C37 | Ir3 | 71.6 (2)    |
| C4  | C5  | Ir1 | 71.0 (2)    | C36 | C37 | C33 | 106.9 (3)   |
| C4  | C5  | C1  | 107.3 (4)   | C36 | C37 | C42 | 127.4 (4)   |
| C4  | C5  | C10 | 125.9 (4)   | C42 | C37 | Ir3 | 128.6 (3)   |
| C10 | C5  | Ir1 | 127.4 (3)   | N6  | C43 | C44 | 114.2 (3)   |
| N2  | C11 | C12 | 112.6 (3)   | N6  | C43 | C48 | 107.1 (3)   |
| N2  | C11 | C16 | 106.7 (3)   | C44 | C43 | C48 | 112.3 (4)   |
| C12 | C11 | C16 | 113.7 (4)   | C45 | C44 | C43 | 114.0 (4)   |
| C11 | C12 | C13 | 111.0 (4)   | C44 | C45 | C46 | 110.9 (4)   |
| C12 | C13 | C14 | 111.0 (4)   | C45 | C46 | C47 | 110.8 (4)   |
| C13 | C14 | C15 | 110.6 (4)   | C48 | C47 | C46 | 110.6 (4)   |
| C16 | C15 | C14 | 112.8 (4)   | N5  | C48 | C43 | 108.8 (3)   |
| N1  | C16 | C11 | 108.3 (3)   | N5  | C48 | C47 | 110.4 (3)   |
| C15 | C16 | N1  | 113.3 (3)   | C47 | C48 | C43 | 111.4 (3)   |
| C15 | C16 | C11 | 112.0 (4)   | N7  | Ir4 | Cl4 | 83.48 (9)   |
| N3  | Ir2 | Cl2 | 83.67 (9)   | N7  | Ir4 | C49 | 122.75 (14) |
| N3  | Ir2 | C17 | 137.96 (15) | N7  | Ir4 | C50 | 161.13 (14) |
| N3  | Ir2 | C18 | 106.43 (14) | N7  | Ir4 | C51 | 142.52 (14) |
| N3  | Ir2 | C19 | 103.11 (14) | N7  | Ir4 | C52 | 106.49 (14) |
| N3  | Ir2 | C20 | 131.47 (14) | N7  | Ir4 | C53 | 98.00 (13)  |
| N4  | Ir2 | Cl2 | 83.78 (9)   | N8  | Ir4 | Cl4 | 83.77 (9)   |
| N4  | Ir2 | N3  | 78.38 (13)  | N8  | Ir4 | N7  | 78.16 (12)  |
| N4  | Ir2 | C17 | 143.02 (15) | N8  | Ir4 | C49 | 102.49 (14) |
| N4  | Ir2 | C18 | 161.64 (14) | N8  | Ir4 | C50 | 106.91 (14) |
| N4  | Ir2 | C19 | 122.87 (14) | N8  | Ir4 | C51 | 138.84 (14) |
| N4  | Ir2 | C20 | 98.16 (14)  | N8  | Ir4 | C52 | 168.06 (14) |
| N4  | Ir2 | C21 | 106.82 (15) | N8  | Ir4 | C53 | 130.01 (14) |

|     |     |     |             |     |     |     |             |
|-----|-----|-----|-------------|-----|-----|-----|-------------|
| C17 | Ir2 | C12 | 92.59 (11)  | C49 | Ir4 | C14 | 153.67 (11) |
| C17 | Ir2 | C18 | 38.30 (16)  | C49 | Ir4 | C50 | 38.79 (15)  |
| C18 | Ir2 | C12 | 114.15 (11) | C50 | Ir4 | C14 | 114.89 (11) |
| C19 | Ir2 | C12 | 153.20 (11) | C51 | Ir4 | C14 | 93.52 (11)  |
| C19 | Ir2 | C17 | 64.85 (16)  | C51 | Ir4 | C49 | 64.80 (15)  |
| C19 | Ir2 | C18 | 39.07 (15)  | C51 | Ir4 | C50 | 38.25 (15)  |
| C20 | Ir2 | C12 | 144.64 (11) | C52 | Ir4 | C14 | 107.51 (11) |
| C20 | Ir2 | C17 | 64.80 (16)  | C52 | Ir4 | C49 | 65.66 (15)  |
| C20 | Ir2 | C18 | 65.13 (15)  | C52 | Ir4 | C50 | 65.19 (15)  |
| C20 | Ir2 | C19 | 38.97 (15)  | C52 | Ir4 | C51 | 39.05 (14)  |
| C21 | Ir2 | C12 | 106.16 (12) | C52 | Ir4 | C53 | 39.27 (15)  |
| C21 | Ir2 | N3  | 169.14 (14) | C53 | Ir4 | C14 | 145.94 (11) |
| C21 | Ir2 | C17 | 39.14 (16)  | C53 | Ir4 | C49 | 38.59 (14)  |
| C21 | Ir2 | C18 | 65.67 (16)  | C53 | Ir4 | C50 | 64.56 (14)  |

file:///Users/joemerola/Desktop/cisaminocyclohexane/DMMXI044A\_ABS\_tables.html

9/17

5/13/2019

DMMXI044A\_ABS

|     |     |     |            |     |     |     |            |
|-----|-----|-----|------------|-----|-----|-----|------------|
| C21 | Ir2 | C19 | 66.04 (15) | C53 | Ir4 | C51 | 64.78 (15) |
| C21 | Ir2 | C20 | 39.31 (16) | C59 | N7  | Ir4 | 111.1 (2)  |
| C27 | N3  | Ir2 | 112.6 (2)  | C64 | N8  | Ir4 | 114.4 (2)  |
| C32 | N4  | Ir2 | 112.2 (2)  | C50 | C49 | Ir4 | 70.8 (2)   |
| C18 | C17 | Ir2 | 70.9 (2)   | C50 | C49 | C55 | 125.2 (4)  |
| C18 | C17 | C21 | 109.1 (4)  | C53 | C49 | Ir4 | 70.1 (2)   |
| C18 | C17 | C22 | 126.7 (4)  | C53 | C49 | C50 | 107.3 (4)  |
| C21 | C17 | Ir2 | 69.2 (2)   | C53 | C49 | C55 | 127.2 (4)  |
| C21 | C17 | C22 | 124.1 (4)  | C55 | C49 | Ir4 | 129.7 (3)  |
| C22 | C17 | Ir2 | 125.4 (3)  | C49 | C50 | Ir4 | 70.4 (2)   |
| C17 | C18 | Ir2 | 70.8 (2)   | C49 | C50 | C56 | 124.3 (4)  |
| C17 | C18 | C19 | 107.8 (4)  | C51 | C50 | Ir4 | 70.6 (2)   |
| C17 | C18 | C23 | 127.2 (4)  | C51 | C50 | C49 | 108.4 (3)  |
| C19 | C18 | Ir2 | 70.0 (2)   | C51 | C50 | C56 | 126.7 (4)  |
| C19 | C18 | C23 | 124.6 (4)  | C56 | C50 | Ir4 | 132.0 (3)  |
| C23 | C18 | Ir2 | 129.9 (3)  | C50 | C51 | Ir4 | 71.2 (2)   |
| C18 | C19 | Ir2 | 70.9 (2)   | C50 | C51 | C52 | 108.6 (4)  |
| C18 | C19 | C24 | 125.1 (4)  | C50 | C51 | C57 | 126.3 (4)  |
| C20 | C19 | Ir2 | 70.2 (2)   | C52 | C51 | Ir4 | 69.5 (2)   |
| C20 | C19 | C18 | 107.5 (4)  | C52 | C51 | C57 | 125.0 (4)  |
| C20 | C19 | C24 | 127.3 (4)  | C57 | C51 | Ir4 | 124.7 (3)  |
| C24 | C19 | Ir2 | 128.2 (3)  | C51 | C52 | Ir4 | 71.5 (2)   |
| C19 | C20 | Ir2 | 70.8 (2)   | C51 | C52 | C53 | 106.8 (3)  |
| C19 | C20 | C21 | 108.7 (4)  | C51 | C52 | C58 | 128.3 (4)  |
| C19 | C20 | C25 | 125.4 (4)  | C53 | C52 | Ir4 | 70.9 (2)   |
| C21 | C20 | Ir2 | 69.8 (2)   | C53 | C52 | C58 | 124.7 (4)  |
| C21 | C20 | C25 | 125.8 (4)  | C58 | C52 | Ir4 | 126.1 (3)  |
| C25 | C20 | Ir2 | 127.1 (3)  | C49 | C53 | Ir4 | 71.3 (2)   |
| C17 | C21 | Ir2 | 71.7 (2)   | C49 | C53 | C52 | 108.9 (3)  |
| C17 | C21 | C26 | 126.5 (4)  | C49 | C53 | C54 | 126.2 (4)  |
| C20 | C21 | Ir2 | 70.9 (2)   | C52 | C53 | Ir4 | 69.8 (2)   |
| C20 | C21 | C17 | 106.8 (4)  | C52 | C53 | C54 | 124.8 (3)  |
| C20 | C21 | C26 | 126.6 (4)  | C54 | C53 | Ir4 | 127.5 (3)  |
| C26 | C21 | Ir2 | 125.4 (3)  | N7  | C59 | C60 | 111.1 (3)  |
| N3  | C27 | C28 | 113.7 (3)  | N7  | C59 | C64 | 106.8 (3)  |

|     |     |     |           |     |     |      |           |
|-----|-----|-----|-----------|-----|-----|------|-----------|
| N3  | C27 | C32 | 108.0 (3) | C60 | C59 | C64  | 112.5 (3) |
| C32 | C27 | C28 | 111.1 (3) | C61 | C60 | C59  | 111.3 (3) |
| C27 | C28 | C29 | 112.9 (3) | C60 | C61 | C62  | 109.5 (3) |
| C30 | C29 | C28 | 111.8 (3) | C63 | C62 | C61  | 111.2 (4) |
| C29 | C30 | C31 | 110.6 (3) | C64 | C63 | C62  | 112.8 (3) |
| C32 | C31 | C30 | 109.4 (3) | N8  | C64 | C59  | 107.4 (3) |
| N4  | C32 | C27 | 106.4 (3) | N8  | C64 | C63  | 112.5 (3) |
| N4  | C32 | C31 | 111.3 (3) | C63 | C64 | C59  | 111.9 (3) |
| C31 | C32 | C27 | 112.9 (3) | Cl9 | C65 | Cl10 | 112.4 (3) |
| N5  | Ir3 | Cl3 | 86.89 (9) |     |     |      |           |

5/13/2019

DMMXI044A\_ABS

Table 6 Torsion Angles for DMMXI044A\_ABS.

| A   | B   | C   | D   | Angle/°    | A   | B   | C   | D   | Angle/°    |
|-----|-----|-----|-----|------------|-----|-----|-----|-----|------------|
| Ir1 | N1  | C16 | C11 | 42.6 (4)   | Ir3 | N5  | C48 | C43 | 23.6 (4)   |
| Ir1 | N1  | C16 | C15 | 167.6 (3)  | Ir3 | N5  | C48 | C47 | -98.9 (3)  |
| Ir1 | N2  | C11 | C12 | -90.9 (4)  | Ir3 | N6  | C43 | C44 | 174.1 (3)  |
| Ir1 | N2  | C11 | C16 | 34.5 (4)   | Ir3 | N6  | C43 | C48 | 49.1 (4)   |
| Ir1 | C1  | C2  | C3  | 60.5 (3)   | Ir3 | C33 | C34 | C35 | 60.5 (3)   |
| Ir1 | C1  | C2  | C7  | -119.1 (4) | Ir3 | C33 | C34 | C39 | -118.6 (4) |
| Ir1 | C1  | C5  | C4  | -62.2 (3)  | Ir3 | C33 | C37 | C36 | -62.9 (3)  |
| Ir1 | C1  | C5  | C10 | 123.1 (5)  | Ir3 | C33 | C37 | C42 | 124.2 (4)  |
| Ir1 | C2  | C3  | C4  | 61.7 (3)   | Ir3 | C34 | C35 | C36 | 62.0 (3)   |
| Ir1 | C2  | C3  | C8  | -120.2 (4) | Ir3 | C34 | C35 | C40 | -118.7 (4) |
| Ir1 | C3  | C4  | C5  | 59.4 (3)   | Ir3 | C35 | C36 | C37 | 58.0 (3)   |
| Ir1 | C3  | C4  | C9  | -119.8 (5) | Ir3 | C35 | C36 | C41 | -122.3 (4) |
| Ir1 | C4  | C5  | C1  | 62.3 (3)   | Ir3 | C36 | C37 | C33 | 62.3 (3)   |
| Ir1 | C4  | C5  | C10 | -123.0 (5) | Ir3 | C36 | C37 | C42 | -125.0 (4) |
| N2  | C11 | C12 | C13 | 174.8 (4)  | N6  | C43 | C44 | C45 | -73.3 (5)  |
| N2  | C11 | C16 | N1  | -49.2 (4)  | N6  | C43 | C48 | N5  | -46.8 (4)  |
| N2  | C11 | C16 | C15 | -175.0 (3) | N6  | C43 | C48 | C47 | 75.1 (4)   |
| C1  | C2  | C3  | Ir1 | -61.3 (3)  | C33 | C34 | C35 | Ir3 | -61.1 (3)  |
| C1  | C2  | C3  | C4  | 0.4 (5)    | C33 | C34 | C35 | C36 | 0.9 (5)    |
| C1  | C2  | C3  | C8  | 178.5 (4)  | C33 | C34 | C35 | C40 | -179.8 (4) |
| C2  | C1  | C5  | Ir1 | 60.0 (3)   | C34 | C33 | C37 | Ir3 | 59.6 (3)   |
| C2  | C1  | C5  | C4  | -2.3 (5)   | C34 | C33 | C37 | C36 | -3.3 (4)   |
| C2  | C1  | C5  | C10 | -177.0 (4) | C34 | C33 | C37 | C42 | -176.3 (4) |
| C2  | C3  | C4  | Ir1 | -61.3 (3)  | C34 | C35 | C36 | Ir3 | -61.0 (3)  |
| C2  | C3  | C4  | C5  | -1.8 (5)   | C34 | C35 | C36 | C37 | -3.0 (5)   |
| C2  | C3  | C4  | C9  | 178.9 (4)  | C34 | C35 | C36 | C41 | 176.6 (4)  |
| C3  | C4  | C5  | Ir1 | -59.7 (3)  | C35 | C36 | C37 | Ir3 | -58.4 (3)  |
| C3  | C4  | C5  | C1  | 2.5 (5)    | C35 | C36 | C37 | C33 | 3.9 (4)    |
| C3  | C4  | C5  | C10 | 177.3 (4)  | C35 | C36 | C37 | C42 | 176.6 (4)  |
| C5  | C1  | C2  | Ir1 | -59.4 (3)  | C37 | C33 | C34 | Ir3 | -59.0 (3)  |
| C5  | C1  | C2  | C3  | 1.2 (5)    | C37 | C33 | C34 | C35 | 1.5 (4)    |
| C5  | C1  | C2  | C7  | -178.5 (4) | C37 | C33 | C34 | C39 | -177.6 (4) |
| C6  | C1  | C2  | Ir1 | 120.9 (4)  | C38 | C33 | C34 | Ir3 | 120.6 (4)  |
| C6  | C1  | C2  | C3  | -178.6 (4) | C38 | C33 | C34 | C35 | -178.9 (4) |
| C6  | C1  | C2  | C7  | 1.7 (7)    | C38 | C33 | C34 | C39 | 2.0 (6)    |
| C6  | C1  | C5  | Ir1 | -120.3 (4) | C38 | C33 | C37 | Ir3 | -120.0 (4) |



|              |            |                 |            |
|--------------|------------|-----------------|------------|
| C6 C1 C5 C4  | 177.5 (4)  | C38 C33 C37 C36 | 177.1 (4)  |
| C6 C1 C5 C10 | 2.8 (7)    | C38 C33 C37 C42 | 4.2 (7)    |
| C7 C2 C3 Ir1 | 118.4 (4)  | C39 C34 C35 Ir3 | 118.0 (4)  |
| C7 C2 C3 C4  | -179.9 (4) | C39 C34 C35 C36 | 180.0 (4)  |
| C7 C2 C3 C8  | -1.8 (7)   | C39 C34 C35 C40 | -0.7 (7)   |
| C8 C3 C4 Ir1 | 120.7 (5)  | C40 C35 C36 Ir3 | 119.7 (4)  |
| C8 C3 C4 C5  | -179.9 (4) | C40 C35 C36 C37 | 177.7 (4)  |
| C8 C3 C4 C9  | 0.8 (8)    | C40 C35 C36 C41 | -2.7 (7)   |
| C9 C4 C5 Ir1 | 119.5 (5)  | C41 C36 C37 Ir3 | 122.0 (4)  |
| C9 C4 C5 C1  | -178.2 (4) | C41 C36 C37 C33 | -175.8 (4) |
| C9 C4 C5 C10 | -3.4 (7)   | C41 C36 C37 C42 | -3.0 (7)   |

file:///Users/joemerola/Desktop/cisaminocyclohexane/DMMXI044A\_ABS\_tables.html

11/17

5/13/2019

DMMXI044A\_ABS

|                 |            |                 |            |
|-----------------|------------|-----------------|------------|
| C11 C12 C13 C14 | -56.4 (5)  | C43 C44 C45 C46 | -51.4 (5)  |
| C12 C11 C16 N1  | 75.5 (4)   | C44 C43 C48 N5  | -172.9 (3) |
| C12 C11 C16 C15 | -50.2 (5)  | C44 C43 C48 C47 | -51.0 (5)  |
| C12 C13 C14 C15 | 56.7 (5)   | C44 C45 C46 C47 | 56.2 (5)   |
| C13 C14 C15 C16 | -54.1 (5)  | C45 C46 C47 C48 | -59.6 (5)  |
| C14 C15 C16 N1  | -72.7 (5)  | C46 C47 C48 N5  | 177.4 (3)  |
| C14 C15 C16 C11 | 50.3 (5)   | C46 C47 C48 C43 | 56.5 (5)   |
| C16 C11 C12 C13 | 53.3 (5)   | C48 C43 C44 C45 | 48.9 (5)   |
| Ir2 N3 C27 C28  | 158.3 (3)  | Ir4 N7 C59 C60  | 75.2 (3)   |
| Ir2 N3 C27 C32  | 34.5 (4)   | Ir4 N7 C59 C64  | -47.8 (3)  |
| Ir2 N4 C32 C27  | 45.0 (3)   | Ir4 N8 C64 C59  | -29.0 (4)  |
| Ir2 N4 C32 C31  | -78.4 (3)  | Ir4 N8 C64 C63  | -152.5 (3) |
| Ir2 C17 C18 C19 | 60.5 (3)   | Ir4 C49 C50 C51 | 60.6 (3)   |
| Ir2 C17 C18 C23 | -126.0 (4) | Ir4 C49 C50 C56 | -128.1 (4) |
| Ir2 C17 C21 C20 | -62.7 (3)  | Ir4 C49 C53 C52 | -59.9 (3)  |
| Ir2 C17 C21 C26 | 120.9 (4)  | Ir4 C49 C53 C54 | 123.3 (4)  |
| Ir2 C18 C19 C20 | 61.1 (3)   | Ir4 C50 C51 C52 | 59.7 (3)   |
| Ir2 C18 C19 C24 | -123.8 (4) | Ir4 C50 C51 C57 | -119.7 (4) |
| Ir2 C19 C20 C21 | 59.7 (3)   | Ir4 C51 C52 C53 | 62.5 (3)   |
| Ir2 C19 C20 C25 | -122.4 (4) | Ir4 C51 C52 C58 | -121.8 (4) |
| Ir2 C20 C21 C17 | 63.2 (3)   | Ir4 C52 C53 C49 | 60.8 (3)   |
| Ir2 C20 C21 C26 | -120.4 (4) | Ir4 C52 C53 C54 | -122.3 (4) |
| N3 C27 C28 C29  | -72.1 (4)  | N7 C59 C60 C61  | -174.8 (3) |
| N3 C27 C32 N4   | -50.8 (4)  | N7 C59 C64 N8   | 48.7 (4)   |
| N3 C27 C32 C31  | 71.7 (4)   | N7 C59 C64 C63  | 172.6 (3)  |
| C17 C18 C19 Ir2 | -61.0 (3)  | C49 C50 C51 Ir4 | -60.6 (3)  |
| C17 C18 C19 C20 | 0.1 (4)    | C49 C50 C51 C52 | -0.9 (4)   |
| C17 C18 C19 C24 | 175.2 (4)  | C49 C50 C51 C57 | 179.7 (4)  |
| C18 C17 C21 Ir2 | 59.8 (3)   | C50 C49 C53 Ir4 | 61.4 (3)   |
| C18 C17 C21 C20 | -2.8 (5)   | C50 C49 C53 C52 | 1.5 (4)    |
| C18 C17 C21 C26 | -179.3 (4) | C50 C49 C53 C54 | -175.3 (4) |
| C18 C19 C20 Ir2 | -61.5 (3)  | C50 C51 C52 Ir4 | -60.7 (3)  |
| C18 C19 C20 C21 | -1.8 (4)   | C50 C51 C52 C53 | 1.8 (4)    |
| C18 C19 C20 C25 | 176.1 (4)  | C50 C51 C52 C58 | 177.5 (4)  |
| C19 C20 C21 Ir2 | -60.3 (3)  | C51 C52 C53 Ir4 | -62.9 (3)  |
| C19 C20 C21 C17 | 2.8 (5)    | C51 C52 C53 C49 | -2.0 (4)   |
| C19 C20 C21 C26 | 179.3 (4)  | C51 C52 C53 C54 | 174.8 (4)  |
| C21 C17 C18 Ir2 | -58.8 (3)  | C53 C49 C50 Ir4 | -61.0 (3)  |

|                 |            |                 |            |
|-----------------|------------|-----------------|------------|
| C21 C17 C18 C19 | 1.7 (4)    | C53 C49 C50 C51 | -0.4 (4)   |
| C21 C17 C18 C23 | 175.2 (4)  | C53 C49 C50 C56 | 170.9 (4)  |
| C22 C17 C18 Ir2 | 120.4 (4)  | C55 C49 C50 Ir4 | 125.6 (4)  |
| C22 C17 C18 C19 | -179.0 (4) | C55 C49 C50 C51 | -173.8 (4) |
| C22 C17 C18 C23 | -5.6 (7)   | C55 C49 C50 C56 | -2.5 (6)   |
| C22 C17 C21 Ir2 | -119.4 (4) | C55 C49 C53 Ir4 | -125.4 (4) |
| C22 C17 C21 C20 | 177.9 (4)  | C55 C49 C53 C52 | 174.7 (4)  |
| C22 C17 C21 C26 | 1.5 (7)    | C55 C49 C53 C54 | -2.1 (7)   |
| C23 C18 C19 Ir2 | 125.3 (4)  | C56 C50 C51 Ir4 | 128.5 (4)  |
| C23 C18 C19 C20 | -173.6 (4) | C56 C50 C51 C52 | -171.9 (4) |
| C23 C18 C19 C24 | 1.5 (6)    | C56 C50 C51 C57 | 8.7 (7)    |

file:///Users/joemerola/Desktop/cisaminocyclohexane/DMMXI044A\_ABS\_tables.html

12/17

| 5/13/2019       |            | DMMXI044A_ABS   |            |
|-----------------|------------|-----------------|------------|
| C24 C19 C20 Ir2 | 123.5 (4)  | C57 C51 C52 Ir4 | 118.7 (4)  |
| C24 C19 C20 C21 | -176.8 (4) | C57 C51 C52 C53 | -178.8 (4) |
| C24 C19 C20 C25 | 1.1 (7)    | C57 C51 C52 C58 | -3.1 (7)   |
| C25 C20 C21 Ir2 | 121.8 (4)  | C58 C52 C53 Ir4 | 121.3 (4)  |
| C25 C20 C21 C17 | -175.1 (4) | C58 C52 C53 C49 | -177.9 (4) |
| C25 C20 C21 C26 | 1.4 (7)    | C58 C52 C53 C54 | -1.1 (6)   |
| C27 C28 C29 C30 | -52.0 (5)  | C59 C60 C61 C62 | 58.0 (4)   |
| C28 C27 C32 N4  | -176.1 (3) | C60 C59 C64 N8  | -73.4 (4)  |
| C28 C27 C32 C31 | -53.7 (4)  | C60 C59 C64 C63 | 50.5 (4)   |
| C28 C29 C30 C31 | 56.0 (5)   | C60 C61 C62 C63 | -57.6 (4)  |
| C29 C30 C31 C32 | -58.4 (4)  | C61 C62 C63 C64 | 54.5 (5)   |
| C30 C31 C32 N4  | 177.5 (3)  | C62 C63 C64 N8  | 70.7 (4)   |
| C30 C31 C32 C27 | 57.9 (4)   | C62 C63 C64 C59 | -50.3 (4)  |
| C32 C27 C28 C29 | 50.0 (4)   | C64 C59 C60 C61 | -55.1 (4)  |

file:///Users/joemerola/Desktop/cisaminocyclohexane/DMMXI044A\_ABS\_tables.html

13/17

5/13/2019 DMMXI044A\_ABS

Table 7 Hydrogen Atom Coordinates ( $\text{\AA} \times 10^4$ ) and Isotropic Displacement Parameters ( $\text{\AA}^2 \times 10^3$ ) for DMMXI044A\_ABS.

| Atom | x        | y       | z       | U(eq) |
|------|----------|---------|---------|-------|
| H1A  | 9540.81  | 3608.74 | 7807.72 | 22    |
| H1B  | 10021.64 | 3469.66 | 7449.83 | 22    |
| H2A  | 9896.36  | 6069.59 | 7396.31 | 22    |
| H2B  | 9339.63  | 6057.61 | 7558.5  | 22    |
| H6A  | 10255.39 | 2929.77 | 6333.08 | 46    |
| H6B  | 10018.09 | 2742.63 | 5595.95 | 46    |
| H6C  | 9665.83  | 2546.01 | 6205.15 | 46    |
| H7A  | 8784.31  | 2986    | 6029.07 | 48    |
| H7B  | 8679.91  | 3358.46 | 5292.41 | 48    |
| H7C  | 8402.53  | 3838.28 | 5885.45 | 48    |
| H8A  | 8361.75  | 5352.25 | 5871.7  | 47    |
| H8B  | 8605.01  | 5783.02 | 5235.8  | 47    |
| H8C  | 8698.14  | 6270.31 | 5937.35 | 47    |
| H9A  | 9557.19  | 6815.78 | 6158.36 | 46    |
| H9B  | 9909.79  | 6658.82 | 5543.73 | 46    |
| H9C  | 10166.52 | 6532.41 | 6279.14 | 46    |

|      |          |         |         |    |
|------|----------|---------|---------|----|
| H10A | 10726.05 | 5311.31 | 6447.88 | 50 |
| H10B | 10790.63 | 4784.11 | 5769.99 | 50 |
| H10C | 10757.48 | 4227.87 | 6441.81 | 50 |
| H11  | 10037.96 | 5809.43 | 8426.37 | 23 |
| H12A | 9062.78  | 4830.83 | 8379.95 | 29 |
| H12B | 9165.21  | 5811.91 | 8701.91 | 29 |
| H13A | 9193.78  | 4667.25 | 9531.87 | 36 |
| H13B | 9749.09  | 5189.53 | 9533.51 | 36 |
| H14A | 9537.65  | 3442.37 | 8944.77 | 40 |
| H14B | 9913.03  | 3614.33 | 9599.7  | 40 |
| H15A | 10536.11 | 4379.56 | 9000.55 | 34 |
| H15B | 10420.88 | 3420.01 | 8653.23 | 34 |
| H16  | 10450.03 | 4671.91 | 7903.65 | 25 |
| H3A  | 6763.94  | 8672.52 | 2897.54 | 19 |
| H3B  | 6862.58  | 9573.99 | 3189.6  | 19 |
| H4A  | 8253.21  | 9151.21 | 2962.6  | 21 |
| H4B  | 8266.97  | 8159.39 | 2889.36 | 21 |
| H22A | 8019.28  | 9236.06 | 5233.23 | 45 |
| H22B | 7807.54  | 8515.87 | 5742.2  | 45 |
| H22C | 7404.49  | 9214.03 | 5372.95 | 45 |
| H23A | 6605.36  | 8764.16 | 4905.51 | 38 |
| H23B | 6472.05  | 7717.88 | 5020.29 | 38 |
| H23C | 6329.11  | 8175.58 | 4317.02 | 38 |
| H24A | 6482.69  | 7136.58 | 3470.55 | 30 |
| H24B | 6656.75  | 6224.44 | 3852.41 | 30 |
| H24C | 6920.99  | 6490.35 | 3185.51 | 30 |
| H25A | 7825.23  | 6363.1  | 3136.11 | 36 |
| H25B | 8072.18  | 5863.93 | 3784.86 | 36 |
| H25C | 8389.43  | 6671.79 | 3463.85 | 36 |

5/13/2019

DMMXI044A\_ABS

|      |         |         |         |    |
|------|---------|---------|---------|----|
| H26A | 8808.32 | 7599.83 | 4230.23 | 44 |
| H26B | 8723.79 | 7413    | 4991.45 | 44 |
| H26C | 8708.32 | 8428.71 | 4714.3  | 44 |
| H27  | 7435.9  | 9994.06 | 2486.74 | 19 |
| H28A | 7058.33 | 9797.02 | 1442.8  | 23 |
| H28B | 6573.98 | 9821.48 | 1909.26 | 23 |
| H29A | 6466.77 | 8254.73 | 1837.72 | 24 |
| H29B | 6482.71 | 8632.38 | 1100.89 | 24 |
| H30A | 7369.08 | 8168.69 | 1056.68 | 24 |
| H30B | 7022.86 | 7314.61 | 1256.91 | 24 |
| H31A | 7313.62 | 7514.39 | 2388.09 | 21 |
| H31B | 7819.23 | 7399.17 | 1959.76 | 21 |
| H32  | 7941.08 | 8980.47 | 1934.99 | 18 |
| H5A  | 4475.03 | 4947.48 | 2647.71 | 21 |
| H5B  | 5047.57 | 5090.88 | 2618.13 | 21 |
| H6D  | 4953.89 | 7407.73 | 2822.67 | 22 |
| H6E  | 4400.44 | 7683.69 | 2659.34 | 22 |
| H38A | 5456.15 | 4621.26 | 1540.37 | 33 |
| H38B | 5317.83 | 4509.83 | 764.81  | 33 |
| H38C | 4881.24 | 4277.54 | 1273.5  | 33 |

|      |         |          |         |    |
|------|---------|----------|---------|----|
| H39A | 4031.07 | 4750.81  | 956.37  | 36 |
| H39B | 4129.65 | 5025.77  | 213.04  | 36 |
| H39C | 3704.95 | 5569.55  | 608.53  | 36 |
| H40A | 3645.88 | 7137.67  | 813.48  | 38 |
| H40B | 3968.77 | 7572.64  | 241.15  | 38 |
| H40C | 3988.78 | 8037.06  | 953.81  | 38 |
| H41A | 4784.47 | 8542.14  | 1387.59 | 31 |
| H41B | 5240.32 | 8412.84  | 886.87  | 31 |
| H41C | 5365.78 | 8236.02  | 1658.28 | 31 |
| H42A | 5903.52 | 6969.6   | 1938.68 | 36 |
| H42B | 6077.66 | 6543.33  | 1262.46 | 36 |
| H42C | 5935.69 | 5892.67  | 1855.28 | 36 |
| H43  | 4063.77 | 6528.86  | 3238.45 | 26 |
| H44A | 4352.64 | 7813.9   | 3901.54 | 31 |
| H44B | 4303.76 | 6887.82  | 4300.98 | 31 |
| H45A | 5082.97 | 7572.59  | 4692.99 | 32 |
| H45B | 5268.06 | 7718.26  | 3962.03 | 32 |
| H46A | 5186.76 | 5993.83  | 4601.03 | 34 |
| H46B | 5731.33 | 6475.24  | 4441.74 | 34 |
| H47A | 5510.89 | 6316.25  | 3291.78 | 28 |
| H47B | 5515.19 | 5341.25  | 3639.99 | 28 |
| H48  | 4588.15 | 5359.9   | 3657.56 | 25 |
| H7D  | 3148.12 | 8457.48  | 2412.06 | 19 |
| H7E  | 3103.23 | 7480.93  | 2547.97 | 19 |
| H8D  | 1766.24 | 7110.67  | 2835.84 | 19 |
| H8E  | 1623.34 | 7967.8   | 2502.08 | 19 |
| H54A | 3211.41 | 10023.83 | 2753.54 | 27 |
| H54B | 2952.76 | 10902.98 | 3062.84 | 27 |
| H54C | 2642.44 | 10372.72 | 2468.37 | 27 |

|      |         |          |         |    |
|------|---------|----------|---------|----|
| H55A | 1758.87 | 10205.84 | 2543.98 | 31 |
| H55B | 1501.1  | 10567.04 | 3192.09 | 31 |
| H55C | 1332.85 | 9599.13  | 2890.35 | 31 |
| H56A | 1204.68 | 8669.91  | 3871.98 | 40 |
| H56B | 1335.49 | 9395.4   | 4445.22 | 40 |
| H56C | 1498.69 | 8355.65  | 4555.71 | 40 |
| H57A | 2332.18 | 7807.84  | 4902.03 | 39 |
| H57B | 2611.65 | 8662.86  | 5263.55 | 39 |
| H57C | 2954.01 | 7972.58  | 4858.6  | 39 |
| H58A | 3581.12 | 8726.16  | 4320.3  | 32 |
| H58B | 3591.48 | 9804.01  | 4232.85 | 32 |
| H58C | 3653.07 | 9158.58  | 3609.93 | 32 |
| H59  | 2789.46 | 7588.56  | 1504.76 | 20 |
| H60A | 2197.64 | 9122.47  | 1924.19 | 23 |
| H60B | 2679.19 | 9166.32  | 1452.5  | 23 |
| H61A | 2167.88 | 8384.3   | 613.4   | 26 |
| H61B | 1855.82 | 9276.75  | 817.78  | 26 |
| H62A | 1326.08 | 8405.63  | 1498.13 | 26 |
| H62B | 1273.78 | 7999.95  | 765.72  | 26 |

|      |         |         |         |    |
|------|---------|---------|---------|----|
| H63A | 1402.09 | 6825.55 | 1569.93 | 23 |
| H63B | 1859.97 | 6821.16 | 1064.3  | 23 |
| H64  | 2277.93 | 6629.52 | 2090.28 | 18 |
| H65A | 6787.69 | 4125.83 | 4504.29 | 41 |
| H65B | 6921.11 | 3943.01 | 5273.56 | 41 |

## Experimental

Single crystals of  $C_{32.5}H_{59}N_4Cl_5Ir_2$  [DMMXI044A\_ABS] were [ ]. A suitable crystal was selected and [ ] on a Gemini\_Mo\_Eos diffractometer. The crystal was kept at 99.9 K during data collection. Using Olex2 [1], the structure was solved with the Unknown [2] structure solution program using Unknown and refined with the ShelXL [3] refinement package using Least Squares minimisation.

1. Dolomanov, O.V., Bourhis, L.J., Gildea, R.J, Howard, J.A.K. & Puschmann, H. (2009), J. Appl. Cryst. 42, 339-341.
- 2.
3. Sheldrick, G.M. (2015). Acta Cryst. C71, 3-8.

## Crystal structure determination of [DMMXI044A\_ABS]

Crystal Data for  $C_{32.5}H_{59}N_4Cl_5Ir_2$  ( $M = 1067.48$  g/mol): monoclinic, space group  $P2_1/c$  (no. 14),  $a = 25.3023(2)$  Å,  $b = 14.75173(12)$  Å,  $c = 20.32938(18)$  Å,  $\beta = 93.8630(8)^\circ$ ,  $V = 7570.75(11)$  Å<sup>3</sup>,  $Z = 8$ ,  $T = 99.9$  K,  $\mu(\text{MoK}\alpha) = 7.405$  mm<sup>-1</sup>,  $D_{\text{calc}} = 1.873$  g/cm<sup>3</sup>, 161024 reflections measured ( $6.956^\circ \leq 2\theta \leq 64.946^\circ$ ), 25813 unique ( $R_{\text{int}} = 0.0659$ ,  $R_{\text{sigma}} = 0.0486$ ) which were used in all calculations. The final  $R_1$  was 0.0338 ( $I > 2\sigma(I)$ ) and  $wR_2$  was 0.0669 (all data).

## Refinement model description

Number of restraints - 0, number of constraints - unknown.

### Details:

#### 1. Fixed Uiso

At 1.2 times of:

All C(H) groups, All C(H,H) groups, All N(H,H) groups

At 1.5 times of:

All C(H,H,H) groups

#### 2.a Ternary CH refined with riding coordinates:

C11(H11), C16(H16), C27(H27), C32(H32), C43(H43), C48(H48), C59(H59), C64(H64)

#### 2.b Secondary CH2 refined with riding coordinates:

N1(H1A,H1B), N2(H2A,H2B), C12(H12A,H12B), C13(H13A,H13B), C14(H14A,H14B),

C15(H15A,H15B), N3(H3A,H3B), N4(H4A,H4B), C28(H28A,H28B), C29(H29A,H29B),

C30(H30A,H30B), C31(H31A,H31B), N5(H5A,H5B), N6(H6D,H6E), C44(H44A,H44B),

C45(H45A,H45B), C46(H46A,H46B), C47(H47A,H47B), N7(H7D,H7E), N8(H8D,H8E),

C60(H60A,H60B), C61(H61A,H61B), C62(H62A,H62B), C63(H63A,H63B), C65(H65A,H65B)

file:///Users/joemerola/Desktop/cisaminocyclohexane/DMMXI044A\_ABS\_tables.html

17/17

2.c Idealised Me refined as rotating group:

C6 (H6A, H6B, H6C), C7 (H7A, H7B, H7C), C8 (H8A, H8B, H8C), C9 (H9A, H9B, H9C), C10 (H10A, H10B, H10C), C22 (H22A, H22B, H22C), C23 (H23A, H23B, H23C), C24 (H24A, H24B, H24C), C25 (H25A, H25B, H25C), C26 (H26A, H26B, H26C), C38 (H38A, H38B, H38C), C39 (H39A, H39B, H39C), C40 (H40A, H40B, H40C), C41 (H41A, H41B, H41C), C42 (H42A, H42B, H42C), C54 (H54A, H54B, H54C), C55 (H55A, H55B, H55C), C56 (H56A, H56B, H56C), C57 (H57A, H57B, H57C), C58 (H58A, H58B, H58C)

This report has been created with Olex2, compiled on May 18 2018 14:05:52 for OlexSys. Please [let us know](#) if there are any errors or if you would like to have additional features.

file:///Users/joemerola/Desktop/DMMXI059/DMMXI059a\_abs\_tables.html

1/13

## Entry 8S. Tables of Data and Bond Lengths and Angles for Compound 2. CCDC1901125

Table 1 Crystal data and structure refinement for DMMXI059a\_abs.

|                                             |                                                                                           |
|---------------------------------------------|-------------------------------------------------------------------------------------------|
| Identification code                         | DMMXI059a_abs                                                                             |
| Empirical formula                           | C <sub>16</sub> H <sub>31</sub> Cl <sub>2</sub> IrN <sub>2</sub> O                        |
| Formula weight                              | 530.53                                                                                    |
| Temperature/K                               | 100.0(6)                                                                                  |
| Crystal system                              | orthorhombic                                                                              |
| Space group                                 | P2 <sub>1</sub> 2 <sub>1</sub> 2 <sub>1</sub>                                             |
| a/Å                                         | 9.16689(15)                                                                               |
| b/Å                                         | 20.2059(4)                                                                                |
| c/Å                                         | 21.1011(4)                                                                                |
| α/°                                         | 90                                                                                        |
| β/°                                         | 90                                                                                        |
| γ/°                                         | 90                                                                                        |
| Volume/Å <sup>3</sup>                       | 3908.44(12)                                                                               |
| Z                                           | 8                                                                                         |
| ρ <sub>calc</sub> /cm <sup>3</sup>          | 1.803                                                                                     |
| μ/mm <sup>1</sup>                           | 7.109                                                                                     |
| F(000)                                      | 2080.0                                                                                    |
| Crystal size/mm <sup>3</sup>                | 0.3217 × 0.2996 × 0.0683                                                                  |
| Radiation                                   | MoKα (λ = 0.71073) 2Θ                                                                     |
| range for data collection/°                 | 7.058 to 64.952                                                                           |
| Index ranges                                | -13 ≤ h ≤ 13, -28 ≤ k ≤ 30, -31 ≤ l ≤ 31                                                  |
| Reflections collected                       | 86880                                                                                     |
| Independent reflections                     | 13359 [R <sub>int</sub> = 0.0662, R <sub>sigma</sub> = 0.0432] Data/restraints/parameters |
|                                             | 13359/0/421                                                                               |
| Goodness-of-fit on F <sup>2</sup>           | 1.087                                                                                     |
| Final R indexes [I ≥ 2σ (I)]                | R <sub>1</sub> = 0.0311, wR <sub>2</sub> = 0.0626                                         |
| Final R indexes [all data]                  | R <sub>1</sub> = 0.0356, wR <sub>2</sub> = 0.0646                                         |
| Largest diff. peak/hole / e Å <sup>-3</sup> | 1.37/-1.13                                                                                |
| Flack parameter                             | -0.006(4)                                                                                 |

## DMMXI059a\_abs

5/13/2019

DMMXI059a\_abs

Table 2 Fractional Atomic Coordinates (×10<sup>4</sup>) and Equivalent Isotropic Displacement Parameters (Å<sup>2</sup>×10<sup>3</sup>) for DMMXI059a\_abs. U<sub>eq</sub> is defined as 1/3 of the trace of the orthogonalised U<sub>ij</sub> tensor.

| Atom | x           | y          | z           | U(eq)     |
|------|-------------|------------|-------------|-----------|
| Ir1  | 7489.2 (2)  | 6306.8 (2) | 6206.9 (2)  | 9.53 (4)  |
| Cl1  | 6873.0 (14) | 5131.4 (6) | 6225.0 (7)  | 16.6 (2)  |
| N1   | 9260 (5)    | 6050 (2)   | 5599 (2)    | 10.9 (9)  |
| N2   | 6457 (4)    | 6329 (2)   | 5307.4 (19) | 10.6 (8)  |
| C1   | 7827 (6)    | 7300 (2)   | 6541 (2)    | 14.6 (10) |

|     |             |            |            |           |
|-----|-------------|------------|------------|-----------|
| C2  | 6309 (6)    | 7115 (3)   | 6635 (3)   | 13.8 (10) |
| C3  | 6246 (6)    | 6553 (3)   | 7037 (3)   | 16.4 (11) |
| C4  | 7741 (6)    | 6388 (3)   | 7227 (2)   | 15.4 (10) |
| C5  | 8699 (6)    | 6848 (3)   | 6920 (3)   | 14.9 (11) |
| C6  | 8404 (6)    | 7898 (3)   | 6202 (3)   | 19.6 (11) |
| C7  | 5040 (6)    | 7446 (3)   | 6320 (3)   | 20.7 (13) |
| C8  | 4881 (6)    | 6204 (3)   | 7261 (3)   | 26.2 (13) |
| C9  | 8175 (7)    | 5832 (3)   | 7653 (3)   | 24.9 (13) |
| C10 | 10317 (6)   | 6865 (3)   | 6981 (3)   | 21.1 (13) |
| C11 | 7286 (6)    | 5921 (2)   | 4845 (2)   | 10.6 (9)  |
| C12 | 8875 (6)    | 6093 (3)   | 4914 (2)   | 12.1 (10) |
| C13 | 9823 (6)    | 5647 (3)   | 4504 (3)   | 15.0 (11) |
| C14 | 9324 (6)    | 5653 (3)   | 3813 (3)   | 19.3 (11) |
| C15 | 7691 (6)    | 5521 (2)   | 3749 (2)   | 17.7 (10) |
| C16 | 6788 (6)    | 5996 (3)   | 4163 (2)   | 13.6 (10) |
| Ir2 | 2320.5 (2)  | 3740.7 (2) | 6161.9 (2) | 9.41 (4)  |
| Cl3 | 1443.1 (14) | 4877.1 (6) | 6137.5 (7) | 16.9 (2)  |
| N3  | 4066 (5)    | 4101 (2)   | 5585 (2)   | 11.0 (9)  |
| N4  | 1448 (5)    | 3596 (2)   | 5236 (2)   | 10.7 (8)  |
| C17 | 3579 (6)    | 3276 (3)   | 6906 (3)   | 14.0 (11) |
| C18 | 2527 (6)    | 3717 (3)   | 7183 (2)   | 16.0 (10) |
| C19 | 1072 (6)    | 3487 (3)   | 6996 (3)   | 14.5 (11) |
| C20 | 1251 (6)    | 2912 (3)   | 6610 (3)   | 13.8 (10) |
| C21 | 2808 (6)    | 2781 (2)   | 6542 (2)   | 12.9 (10) |
| C22 | 5203 (6)    | 3322 (3)   | 6971 (3)   | 21.5 (13) |
| C23 | 2827 (7)    | 4311 (3)   | 7586 (3)   | 21.6 (12) |
| C24 | -342 (6)    | 3792 (3)   | 7196 (3)   | 22.8 (12) |
| C25 | 66 (6)      | 2513 (3)   | 6313 (3)   | 21.1 (13) |
| C26 | 3476 (6)    | 2195 (2)   | 6220 (3)   | 17.0 (11) |
| C27 | 3485 (6)    | 4311 (2)   | 4965 (2)   | 10.0 (9)  |
| C28 | 2521 (5)    | 3756 (2)   | 4727 (2)   | 11.5 (9)  |
| C29 | 1772 (6)    | 3945 (3)   | 4102 (3)   | 15.8 (11) |
| C30 | 2903 (6)    | 4173 (3)   | 3605 (2)   | 15.9 (11) |
| C31 | 3910 (5)    | 4715 (2)   | 3869 (3)   | 13.7 (10) |
| C32 | 4661 (6)    | 4481 (3)   | 4477 (3)   | 13.7 (11) |
| Cl2 | 1653.9 (14) | 7212.0 (6) | 5363.4 (7) | 15.7 (3)  |
| Cl4 | 6441.8 (15) | 2931.4 (6) | 5312.4 (7) | 16.6 (3)  |
| O1  | 3475 (5)    | 5928 (2)   | 5351 (3)   | 30.2 (11) |
| O2  | 8515 (5)    | 4156 (2)   | 5180 (2)   | 23.6 (9)  |

file:///Users/joemerola/Desktop/DMMXI059/DMMXI059a\_abs\_tables.html

2/13

5/13/2019

DMMXI059a\_abs

file:///Users/joemerola/Desktop/DMMXI059/DMMXI059a\_abs\_tables.html

3/13

5/13/2019

DMMXI059a\_abs

Table 3 Anisotropic Displacement Parameters ( $\text{\AA}^2 \times 10^3$ ) for DMMXI059a\_abs. The Anisotropic displacement factor exponent takes the form:

$$-2\pi^2[h^2a^2U_{11}+2hka*b*U_{12}+...].$$

| Atom | $U_{11}$  | $U_{22}$ | $U_{33}$ | $U_{23}$ | $U_{13}$ | $U_{12}$ |
|------|-----------|----------|----------|----------|----------|----------|
| Ir1  | 11.50 (8) | 7.61 (8) | 9.48 (8) | 0.74 (7) | 0.44 (7) | 0.16 (7) |



|     |           |          |          |           |           |           |
|-----|-----------|----------|----------|-----------|-----------|-----------|
| Cl1 | 20.4 (6)  | 9.6 (5)  | 19.7 (6) | 1.6 (5)   | 1.1 (5)   | -2.1 (4)  |
| N1  | 13 (2)    | 9 (2)    | 11 (2)   | -1.0 (17) | -1.4 (16) | -0.6 (17) |
| N2  | 13.6 (18) | 9 (2)    | 8.8 (19) | -0.4 (17) | 2.6 (15)  | 0.0 (18)  |
| C1  | 20 (3)    | 13 (2)   | 12 (2)   | -3.0 (19) | -3 (2)    | 0 (2)     |
| C2  | 19 (3)    | 11 (2)   | 11 (3)   | -2 (2)    | 0 (2)     | 2 (2)     |
| C3  | 18 (3)    | 15 (3)   | 17 (3)   | -5 (2)    | 4 (2)     | -1 (2)    |
| C4  | 20 (2)    | 16 (2)   | 11 (2)   | -2.2 (18) | -2.9 (19) | 3 (2)     |
| C5  | 22 (3)    | 12 (3)   | 10 (3)   | -1 (2)    | -1 (2)    | 0 (2)     |
| C6  | 29 (3)    | 15 (2)   | 15 (3)   | 1 (2)     | -3 (3)    | -5 (2)    |
| C7  | 23 (3)    | 24 (3)   | 16 (3)   | -1 (2)    | 2 (2)     | 9 (2)     |
| C8  | 24 (3)    | 29 (3)   | 25 (3)   | 0 (3)     | 9 (2)     | -4 (3)    |
| C9  | 32 (3)    | 28 (3)   | 15 (3)   | 8 (2)     | -1 (3)    | 5 (3)     |
| C10 | 16 (3)    | 32 (3)   | 15 (3)   | -1 (2)    | -4 (2)    | -2 (2)    |
| C11 | 15 (2)    | 6.6 (19) | 10 (2)   | -1.5 (16) | 3.8 (19)  | -0.6 (19) |
| C12 | 14 (2)    | 12 (2)   | 11 (2)   | -2.4 (19) | 0.9 (18)  | -1.7 (18) |
| C13 | 15 (3)    | 15 (3)   | 15 (3)   | -4 (2)    | 2 (2)     | 0 (2)     |
| C14 | 26 (3)    | 14 (2)   | 18 (3)   | -3 (2)    | 10 (3)    | 0 (2)     |
| C15 | 28 (3)    | 16 (2)   | 9 (2)    | -4.5 (19) | 0 (2)     | 0 (2)     |
| C16 | 19 (3)    | 13 (2)   | 9 (2)    | 0.1 (19)  | -2.7 (19) | 1 (2)     |
| Ir2 | 10.82 (7) | 7.87 (8) | 9.54 (8) | -0.24 (7) | 0.16 (7)  | 0.16 (7)  |
| Cl3 | 20.1 (6)  | 10.1 (5) | 20.4 (7) | -0.7 (5)  | 0.7 (6)   | 4.5 (4)   |
| N3  | 16 (2)    | 7.1 (19) | 9 (2)    | 0.5 (16)  | -1.4 (16) | -2.4 (16) |
| N4  | 13.6 (19) | 8.6 (19) | 10 (2)   | 1.1 (16)  | -0.7 (16) | -1.4 (16) |
| C17 | 16 (3)    | 14 (3)   | 12 (3)   | 2 (2)     | 1 (2)     | 1 (2)     |
| C18 | 22 (2)    | 19 (2)   | 8 (2)    | 1.5 (18)  | -1.3 (18) | 1 (3)     |
| C19 | 15 (2)    | 15 (3)   | 13 (3)   | 5 (2)     | 4 (2)     | -1 (2)    |
| C20 | 18 (3)    | 14 (3)   | 10 (3)   | 3 (2)     | 1 (2)     | -1 (2)    |
| C21 | 18 (2)    | 11 (2)   | 9 (2)    | 2.9 (18)  | 2 (2)     | 1 (2)     |
| C22 | 17 (3)    | 29 (3)   | 18 (3)   | 1 (3)     | -3 (2)    | 2 (2)     |
| C23 | 29 (3)    | 24 (3)   | 12 (2)   | -8 (2)    | 2 (2)     | -4 (2)    |
| C24 | 22 (3)    | 25 (3)   | 21 (3)   | -2 (3)    | 8 (2)     | 2 (3)     |
| C25 | 24 (3)    | 21 (3)   | 18 (3)   | -4 (2)    | 2 (3)     | -9 (2)    |
| C26 | 21 (2)    | 11 (2)   | 19 (3)   | 1 (2)     | 1 (2)     | 3.9 (19)  |
| C27 | 9 (2)     | 10 (2)   | 10 (2)   | -0.2 (18) | -0.5 (17) | -2.9 (18) |
| C28 | 12 (2)    | 10 (2)   | 13 (2)   | -2.2 (17) | -0.2 (17) | 0 (2)     |
| C29 | 17 (2)    | 14 (2)   | 16 (3)   | 0 (2)     | -2 (2)    | -4 (2)    |
| C30 | 26 (3)    | 12 (2)   | 9 (2)    | 0.2 (18)  | -3 (2)    | 0 (2)     |
| C31 | 16 (2)    | 14 (2)   | 11 (2)   | -1 (2)    | 2 (2)     | -3.5 (18) |
| C32 | 13 (2)    | 13 (2)   | 15 (3)   | 1 (2)     | -1.5 (19) | -3 (2)    |
| Cl2 | 16.9 (6)  | 12.2 (6) | 18.1 (7) | 1.3 (5)   | 0.6 (5)   | -1.3 (5)  |
| Cl4 | 19.2 (6)  | 12.0 (6) | 18.7 (7) | -2.4 (5)  | 3.4 (5)   | 0.6 (5)   |
| O1  | 17 (2)    | 17 (2)   | 57 (3)   | 3 (2)     | 2 (2)     | 2.3 (18)  |
| O2  | 18 (2)    | 17 (2)   | 36 (3)   | -4.2 (19) | 3.0 (19)  | -1.5 (17) |

Table 4 Bond Lengths for DMMXI059a\_abs.

Atom Atom Length/Å Atom Atom Length/Å

|     |     |             |     |     |             |
|-----|-----|-------------|-----|-----|-------------|
| Ir1 | Cl1 | 2.4415 (12) | Ir2 | Cl3 | 2.4335 (12) |
| Ir1 | N1  | 2.132 (5)   | Ir2 | N3  | 2.138 (4)   |
| Ir1 | N2  | 2.121 (4)   | Ir2 | N4  | 2.131 (4)   |
| Ir1 | C1  | 2.149 (5)   | Ir2 | C17 | 2.163 (5)   |
| Ir1 | C2  | 2.157 (5)   | Ir2 | C18 | 2.163 (5)   |
| Ir1 | C3  | 2.149 (6)   | Ir2 | C19 | 2.161 (5)   |
| Ir1 | C4  | 2.171 (5)   | Ir2 | C20 | 2.158 (5)   |
| Ir1 | C5  | 2.166 (6)   | Ir2 | C21 | 2.146 (5)   |
| N1  | C12 | 1.492 (7)   | N3  | C27 | 1.476 (6)   |
| N2  | C11 | 1.486 (6)   | N4  | C28 | 1.492 (6)   |
| C1  | C2  | 1.455 (8)   | C17 | C18 | 1.437 (7)   |
| C1  | C5  | 1.454 (7)   | C17 | C21 | 1.448 (7)   |
| C1  | C6  | 1.501 (7)   | C17 | C22 | 1.498 (8)   |
| C2  | C3  | 1.420 (8)   | C18 | C19 | 1.467 (7)   |
| C2  | C7  | 1.496 (8)   | C18 | C23 | 1.496 (7)   |
| C3  | C4  | 1.466 (8)   | C19 | C20 | 1.427 (8)   |
| C3  | C8  | 1.511 (8)   | C19 | C24 | 1.497 (8)   |
| C4  | C5  | 1.433 (8)   | C20 | C21 | 1.459 (7)   |
| C4  | C9  | 1.493 (7)   | C20 | C25 | 1.492 (8)   |
| C5  | C10 | 1.489 (8)   | C21 | C26 | 1.496 (7)   |
| C11 | C12 | 1.505 (7)   | C27 | C28 | 1.513 (6)   |
| C11 | C16 | 1.518 (7)   | C27 | C32 | 1.529 (7)   |
| C12 | C13 | 1.521 (7)   | C28 | C29 | 1.535 (7)   |
| C13 | C14 | 1.527 (8)   | C29 | C30 | 1.545 (7)   |
| C14 | C15 | 1.526 (8)   | C30 | C31 | 1.537 (7)   |
| C15 | C16 | 1.538 (7)   | C31 | C32 | 1.531 (7)   |

5/13/2019

DMMXI059a\_abs

Table 5 Bond Angles for DMMXI059a\_abs.

| Atom | Atom | Atom | Angle/°     | Atom | Atom | Atom | Angle/°     |
|------|------|------|-------------|------|------|------|-------------|
| N1   | Ir1  | Cl1  | 87.08 (13)  | N3   | Ir2  | Cl3  | 85.04 (12)  |
| N1   | Ir1  | C1   | 108.3 (2)   | N3   | Ir2  | C17  | 99.32 (19)  |
| N1   | Ir1  | C2   | 144.8 (2)   | N3   | Ir2  | C18  | 120.59 (18) |
| N1   | Ir1  | C3   | 161.9 (2)   | N3   | Ir2  | C19  | 160.17 (19) |
| N1   | Ir1  | C4   | 122.24 (19) | N3   | Ir2  | C20  | 148.62 (19) |
| N1   | Ir1  | C5   | 98.7 (2)    | N3   | Ir2  | C21  | 111.40 (18) |
| N2   | Ir1  | Cl1  | 86.05 (12)  | N4   | Ir2  | Cl3  | 89.22 (12)  |
| N2   | Ir1  | N1   | 78.85 (16)  | N4   | Ir2  | N3   | 78.81 (16)  |
| N2   | Ir1  | C1   | 109.76 (18) | N4   | Ir2  | C17  | 143.72 (18) |
| N2   | Ir1  | C2   | 97.76 (18)  | N4   | Ir2  | C18  | 160.52 (18) |
| N2   | Ir1  | C3   | 119.2 (2)   | N4   | Ir2  | C19  | 121.0 (2)   |
| N2   | Ir1  | C4   | 158.91 (18) | N4   | Ir2  | C20  | 97.17 (19)  |
| N2   | Ir1  | C5   | 147.11 (19) | N4   | Ir2  | C21  | 107.22 (18) |
| C1   | Ir1  | Cl1  | 159.47 (15) | C17  | Ir2  | Cl3  | 126.94 (15) |
| C1   | Ir1  | C2   | 39.5 (2)    | C17  | Ir2  | C18  | 38.81 (19)  |
| C1   | Ir1  | C4   | 65.8 (2)    | C18  | Ir2  | Cl3  | 94.04 (14)  |
| C1   | Ir1  | C5   | 39.4 (2)    | C19  | Ir2  | Cl3  | 93.79 (15)  |
| C2   | Ir1  | Cl1  | 127.88 (15) | C19  | Ir2  | C17  | 65.7 (2)    |
| C2   | Ir1  | C4   | 65.2 (2)    | C19  | Ir2  | C18  | 39.7 (2)    |
| C2   | Ir1  | C5   | 65.4 (2)    | C20  | Ir2  | Cl3  | 126.23 (15) |

|     |     |     |             |     |     |     |             |
|-----|-----|-----|-------------|-----|-----|-----|-------------|
| C3  | Ir1 | Cl1 | 95.14 (16)  | C20 | Ir2 | C17 | 65.6 (2)    |
| C3  | Ir1 | C1  | 66.0 (2)    | C20 | Ir2 | C18 | 65.6 (2)    |
| C3  | Ir1 | C2  | 38.5 (2)    | C20 | Ir2 | C19 | 38.6 (2)    |
| C3  | Ir1 | C4  | 39.7 (2)    | C21 | Ir2 | Cl3 | 158.40 (14) |
| C3  | Ir1 | C5  | 65.7 (2)    | C21 | Ir2 | C17 | 39.3 (2)    |
| C4  | Ir1 | Cl1 | 94.73 (15)  | C21 | Ir2 | C18 | 65.82 (19)  |
| C5  | Ir1 | Cl1 | 126.77 (15) | C21 | Ir2 | C19 | 65.9 (2)    |
| C5  | Ir1 | C4  | 38.6 (2)    | C21 | Ir2 | C20 | 39.6 (2)    |
| C12 | N1  | Ir1 | 112.9 (3)   | C27 | N3  | Ir2 | 109.5 (3)   |
| C11 | N2  | Ir1 | 110.4 (3)   | C28 | N4  | Ir2 | 112.5 (3)   |
| C2  | C1  | Ir1 | 70.6 (3)    | C18 | C17 | Ir2 | 70.6 (3)    |
| C2  | C1  | C6  | 127.5 (5)   | C18 | C17 | C21 | 108.5 (5)   |
| C5  | C1  | Ir1 | 70.9 (3)    | C18 | C17 | C22 | 126.3 (5)   |
| C5  | C1  | C2  | 106.8 (5)   | C21 | C17 | Ir2 | 69.8 (3)    |
| C5  | C1  | C6  | 125.1 (5)   | C21 | C17 | C22 | 125.2 (5)   |
| C6  | C1  | Ir1 | 130.3 (4)   | C22 | C17 | Ir2 | 124.7 (4)   |
| C1  | C2  | Ir1 | 69.9 (3)    | C17 | C18 | Ir2 | 70.6 (3)    |
| C1  | C2  | C7  | 124.7 (5)   | C17 | C18 | C19 | 107.7 (5)   |
| C3  | C2  | Ir1 | 70.4 (3)    | C17 | C18 | C23 | 127.2 (5)   |
| C3  | C2  | C1  | 109.0 (5)   | C19 | C18 | Ir2 | 70.1 (3)    |
| C3  | C2  | C7  | 126.2 (5)   | C19 | C18 | C23 | 125.1 (5)   |
| C7  | C2  | Ir1 | 122.8 (4)   | C23 | C18 | Ir2 | 124.4 (4)   |
| C2  | C3  | Ir1 | 71.1 (3)    | C18 | C19 | Ir2 | 70.3 (3)    |
| C2  | C3  | C4  | 107.9 (5)   | C18 | C19 | C24 | 125.5 (5)   |
| C2  | C3  | C8  | 126.4 (5)   | C20 | C19 | Ir2 | 70.6 (3)    |
| C4  | C3  | Ir1 | 71.0 (3)    | C20 | C19 | C18 | 107.9 (5)   |
| C4  | C3  | C8  | 125.7 (5)   | C20 | C19 | C24 | 126.6 (5)   |

file:///Users/joemerola/Desktop/DMMXI059/DMMXI059a\_abs\_tables.html

7/13

5/13/2019

DMMXI059a\_abs

|     |     |     |           |     |     |     |           |
|-----|-----|-----|-----------|-----|-----|-----|-----------|
| C8  | C3  | Ir1 | 125.8 (4) | C24 | C19 | Ir2 | 126.2 (4) |
| C3  | C4  | Ir1 | 69.3 (3)  | C19 | C20 | Ir2 | 70.8 (3)  |
| C3  | C4  | C9  | 125.8 (5) | C19 | C20 | C21 | 108.5 (5) |
| C5  | C4  | Ir1 | 70.5 (3)  | C19 | C20 | C25 | 126.6 (5) |
| C5  | C4  | C3  | 107.6 (5) | C21 | C20 | Ir2 | 69.7 (3)  |
| C5  | C4  | C9  | 126.6 (5) | C21 | C20 | C25 | 124.9 (5) |
| C9  | C4  | Ir1 | 124.6 (4) | C25 | C20 | Ir2 | 124.4 (4) |
| C1  | C5  | Ir1 | 69.7 (3)  | C17 | C21 | Ir2 | 71.0 (3)  |
| C1  | C5  | C10 | 125.5 (5) | C17 | C21 | C20 | 107.4 (5) |
| C4  | C5  | Ir1 | 70.9 (3)  | C17 | C21 | C26 | 126.1 (5) |
| C4  | C5  | C1  | 108.6 (5) | C20 | C21 | Ir2 | 70.6 (3)  |
| C4  | C5  | C10 | 125.9 (5) | C20 | C21 | C26 | 126.2 (5) |
| C10 | C5  | Ir1 | 125.5 (4) | C26 | C21 | Ir2 | 129.1 (4) |
| N2  | C11 | C12 | 107.7 (4) | N3  | C27 | C28 | 106.9 (4) |
| N2  | C11 | C16 | 114.5 (4) | N3  | C27 | C32 | 114.0 (4) |
| C12 | C11 | C16 | 111.1 (4) | C28 | C27 | C32 | 110.8 (4) |
| N1  | C12 | C11 | 108.0 (4) | N4  | C28 | C27 | 107.9 (4) |
| N1  | C12 | C13 | 112.5 (4) | N4  | C28 | C29 | 112.2 (4) |
| C11 | C12 | C13 | 111.2 (4) | C27 | C28 | C29 | 111.2 (4) |
| C12 | C13 | C14 | 111.6 (5) | C28 | C29 | C30 | 110.9 (4) |
| C15 | C14 | C13 | 112.1 (5) | C31 | C30 | C29 | 111.7 (4) |
| C14 | C15 | C16 | 111.7 (4) | C32 | C31 | C30 | 110.7 (4) |

5/13/2019

DMMXI059a\_abs

Table 6 Hydrogen Bonds for DMMXI059a\_abs.

| D  | H   | A               | d(D-H)/Å | d(H-A)/Å | d(D-A)/Å  | D-H-A/° |
|----|-----|-----------------|----------|----------|-----------|---------|
| N2 | H2A | O1              | 0.91     | 1.95     | 2.854 (6) | 172.6   |
| N4 | H4B | O2 <sup>1</sup> | 0.91     | 2.05     | 2.920 (6) | 160.9   |
| O1 | H1D | Cl2             | 0.85     | 2.26     | 3.086 (4) | 163.7   |
| O2 | H2D | Cl4             | 0.85     | 2.32     | 3.133 (4) | 160.2   |

<sup>1</sup>-1+X,+Y,+Z

5/13/2019

DMMXI059a\_abs

Table 7 Torsion Angles for DMMXI059a\_abs.

| A   | B   | C   | D   | Angle/°    | A   | B   | C   | D   | Angle/°    |
|-----|-----|-----|-----|------------|-----|-----|-----|-----|------------|
| Ir1 | N1  | C12 | C11 | -32.0 (5)  | Ir2 | N3  | C27 | C28 | -48.5 (4)  |
| Ir1 | N1  | C12 | C13 | -155.0 (3) | Ir2 | N3  | C27 | C32 | -171.3 (3) |
| Ir1 | N2  | C11 | C12 | -46.1 (4)  | Ir2 | N4  | C28 | C27 | -32.4 (4)  |
| Ir1 | N2  | C11 | C16 | -170.2 (3) | Ir2 | N4  | C28 | C29 | -155.2 (3) |
| Ir1 | C1  | C2  | C3  | 59.8 (4)   | Ir2 | C17 | C18 | C19 | 60.5 (3)   |
| Ir1 | C1  | C2  | C7  | -116.7 (5) | Ir2 | C17 | C18 | C23 | -119.0 (5) |
| Ir1 | C1  | C5  | C4  | -60.5 (4)  | Ir2 | C17 | C21 | C20 | -61.6 (4)  |
| Ir1 | C1  | C5  | C10 | 119.8 (6)  | Ir2 | C17 | C21 | C26 | 125.1 (5)  |
| Ir1 | C2  | C3  | C4  | 61.8 (4)   | Ir2 | C18 | C19 | C20 | 60.9 (4)   |
| Ir1 | C2  | C3  | C8  | -121.1 (6) | Ir2 | C18 | C19 | C24 | -121.0 (6) |
| Ir1 | C3  | C4  | C5  | 60.4 (4)   | Ir2 | C19 | C20 | C21 | 59.8 (4)   |
| Ir1 | C3  | C4  | C9  | -118.5 (5) | Ir2 | C19 | C20 | C25 | -119.2 (6) |
| Ir1 | C4  | C5  | C1  | 59.7 (4)   | Ir2 | C20 | C21 | C17 | 61.9 (4)   |
| Ir1 | C4  | C5  | C10 | -120.6 (6) | Ir2 | C20 | C21 | C26 | -124.9 (5) |
| N1  | C12 | C13 | C14 | 175.0 (4)  | N3  | C27 | C28 | N4  | 52.6 (5)   |
| N2  | C11 | C12 | N1  | 50.4 (5)   | N3  | C27 | C28 | C29 | 176.0 (4)  |
| N2  | C11 | C12 | C13 | 174.2 (4)  | N3  | C27 | C32 | C31 | -177.8 (4) |
| N2  | C11 | C16 | C15 | -177.2 (4) | N4  | C28 | C29 | C30 | 174.5 (4)  |
| C1  | C2  | C3  | Ir1 | -59.5 (4)  | C17 | C18 | C19 | Ir2 | -60.9 (4)  |
| C1  | C2  | C3  | C4  | 2.3 (6)    | C17 | C18 | C19 | C20 | 0.0 (6)    |
| C1  | C2  | C3  | C8  | 179.4 (5)  | C17 | C18 | C19 | C24 | 178.2 (5)  |
| C2  | C1  | C5  | Ir1 | 61.8 (4)   | C18 | C17 | C21 | Ir2 | 60.2 (4)   |
| C2  | C1  | C5  | C4  | 1.4 (6)    | C18 | C17 | C21 | C20 | -1.4 (6)   |
| C2  | C1  | C5  | C10 | -178.4 (5) | C18 | C17 | C21 | C26 | -174.7 (5) |
| C2  | C3  | C4  | Ir1 | -61.9 (4)  | C18 | C19 | C20 | Ir2 | -60.7 (4)  |
| C2  | C3  | C4  | C5  | -1.4 (6)   | C18 | C19 | C20 | C21 | -0.9 (6)   |
| C2  | C3  | C4  | C9  | 179.7 (5)  | C18 | C19 | C20 | C25 | -179.9 (5) |
| C3  | C4  | C5  | Ir1 | -59.7 (4)  | C19 | C20 | C21 | Ir2 | -60.4 (4)  |
| C3  | C4  | C5  | C1  | 0.0 (6)    | C19 | C20 | C21 | C17 | 1.4 (6)    |
| C3  | C4  | C5  | C10 | 179.8 (5)  | C19 | C20 | C21 | C26 | 174.7 (5)  |
| C5  | C1  | C2  | Ir1 | -62.1 (4)  | C21 | C17 | C18 | Ir2 | -59.7 (4)  |
| C5  | C1  | C2  | C3  | -2.3 (6)   | C21 | C17 | C18 | C19 | 0.8 (6)    |
| C5  | C1  | C2  | C7  | -178.8 (5) | C21 | C17 | C18 | C23 | -178.6 (5) |
| C6  | C1  | C2  | Ir1 | 126.5 (5)  | C22 | C17 | C18 | Ir2 | 119.4 (6)  |

|              |            |                 |            |
|--------------|------------|-----------------|------------|
| C6 C1 C2 C3  | -173.7 (5) | C22 C17 C18 C19 | 179.9 (5)  |
| C6 C1 C2 C7  | 9.8 (9)    | C22 C17 C18 C23 | 0.5 (9)    |
| C6 C1 C5 Ir1 | -126.5 (5) | C22 C17 C21 Ir2 | -118.9 (6) |
| C6 C1 C5 C4  | 173.1 (5)  | C22 C17 C21 C20 | 179.5 (5)  |
| C6 C1 C5 C10 | -6.7 (9)   | C22 C17 C21 C26 | 6.2 (9)    |
| C7 C2 C3 Ir1 | 116.9 (6)  | C23 C18 C19 Ir2 | 118.6 (5)  |
| C7 C2 C3 C4  | 178.7 (5)  | C23 C18 C19 C20 | 179.6 (5)  |
| C7 C2 C3 C8  | -4.2 (9)   | C23 C18 C19 C24 | -2.3 (9)   |
| C8 C3 C4 Ir1 | 121.0 (6)  | C24 C19 C20 Ir2 | 121.2 (6)  |
| C8 C3 C4 C5  | -178.6 (5) | C24 C19 C20 C21 | -179.0 (5) |
| C8 C3 C4 C9  | 2.5 (9)    | C24 C19 C20 C25 | 2.1 (9)    |
| C9 C4 C5 Ir1 | 119.2 (5)  | C25 C20 C21 Ir2 | 118.5 (5)  |
| C9 C4 C5 C1  | 178.9 (5)  | C25 C20 C21 C17 | -179.6 (5) |

file:///Users/joemerola/Desktop/DMMXI059/DMMXI059a\_abs\_tables.html

10/13

5/13/2019

DMMXI059a\_abs

|                 |           |                 |           |
|-----------------|-----------|-----------------|-----------|
| C9 C4 C5 C10    | -1.4 (9)  | C25 C20 C21 C26 | -6.3 (9)  |
| C11 C12 C13 C14 | 53.8 (6)  | C27 C28 C29 C30 | 53.6 (5)  |
| C12 C11 C16 C15 | 60.5 (5)  | C28 C27 C32 C31 | 61.5 (5)  |
| C12 C13 C14 C15 | -50.8 (6) | C28 C29 C30 C31 | -51.9 (6) |
| C13 C14 C15 C16 | 53.3 (6)  | C29 C30 C31 C32 | 55.6 (6)  |
| C14 C15 C16 C11 | -57.2 (6) | C30 C31 C32 C27 | -59.4 (6) |
| C16 C11 C12 N1  | 176.5 (4) | C32 C27 C28 N4  | 177.4 (4) |
| C16 C11 C12 C13 | -59.7 (5) | C32 C27 C28 C29 | -59.2 (5) |

file:///Users/joemerola/Desktop/DMMXI059/DMMXI059a\_abs\_tables.html

11/13

5/13/2019

DMMXI059a\_abs

Table 8 Hydrogen Atom Coordinates ( $\text{\AA} \times 10^4$ ) and Isotropic Displacement Parameters ( $\text{\AA}^2 \times 10^3$ ) for DMMXI059a\_abs.

| Atom | <i>x</i>  | <i>y</i>  | <i>z</i>  | U(eq)   |
|------|-----------|-----------|-----------|---------|
| H1A  | 9640 (60) | 5650 (30) | 5680 (30) | 7 (15)  |
| H1B  | 9900 (70) | 6290 (30) | 5680 (30) | 17 (17) |
| H2A  | 5532.11   | 6169.84   | 5342.69   | 13      |
| H2B  | 6405.73   | 6753.71   | 5166.6    | 13      |
| H6A  | 7757.92   | 8008.46   | 5847.24   | 29      |
| H6B  | 9385.39   | 7805      | 6040.5    | 29      |
| H6C  | 8446.09   | 8272.69   | 6496.69   | 29      |
| H7A  | 4626.34   | 7778.21   | 6606.69   | 31      |
| H7B  | 4295.69   | 7114.42   | 6218.69   | 31      |
| H7C  | 5368.26   | 7661.41   | 5929.34   | 31      |
| H8A  | 5107.34   | 5740.17   | 7353.38   | 39      |
| H8B  | 4135.92   | 6226.14   | 6928.48   | 39      |
| H8C  | 4516.04   | 6420.31   | 7644.96   | 39      |
| H9A  | 7485.4    | 5464.48   | 7602.94   | 37      |
| H9B  | 8164.88   | 5983.43   | 8093.98   | 37      |
| H9C  | 9158.33   | 5681.57   | 7541.36   | 37      |
| H10A | 10750.17  | 6974.93   | 6569.28   | 32      |
| H10B | 10669.42  | 6430.29   | 7118.79   | 32      |
| H10C | 10595.8   | 7200.35   | 7293.23   | 32      |
| H11  | 7164.12   | 5446.3    | 4967      | 13      |

|      |          |         |         |    |
|------|----------|---------|---------|----|
| H12  | 9017.2   | 6560.96 | 4771.43 | 14 |
| H13A | 9778.96  | 5189.11 | 4668.98 | 18 |
| H13B | 10848.48 | 5798.17 | 4527.66 | 18 |
| H14A | 9555.29  | 6088.08 | 3623    | 23 |
| H14B | 9869.25  | 5310.39 | 3574.8  | 23 |
| H15A | 7481.97  | 5059.09 | 3876.02 | 21 |
| H15B | 7399.9   | 5573.98 | 3300.25 | 21 |
| H16A | 6932.07  | 6457.68 | 4019.44 | 16 |
| H16B | 5737.67  | 5887.32 | 4127.15 | 16 |
| H3A  | 4505.41  | 4450.2  | 5780.21 | 13 |
| H3B  | 4742.89  | 3777.4  | 5529.85 | 13 |
| H4A  | 1162.53  | 3166.49 | 5194.54 | 13 |
| H4B  | 645.13   | 3855.54 | 5187.53 | 13 |
| H22A | 5479.84  | 3781.12 | 7061.49 | 32 |
| H22B | 5665.35  | 3178.98 | 6575.45 | 32 |
| H22C | 5527.31  | 3036.5  | 7319.08 | 32 |
| H23A | 3816.79  | 4472.1  | 7501.54 | 32 |
| H23B | 2740.49  | 4190.07 | 8034.11 | 32 |
| H23C | 2121.31  | 4660.16 | 7486.19 | 32 |
| H24A | -240.02  | 4275.08 | 7205.06 | 34 |
| H24B | -604.22  | 3632.41 | 7619.1  | 34 |
| H24C | -1108.43 | 3669.71 | 6893.88 | 34 |
| H25A | 422.41   | 2318.08 | 5916.71 | 32 |
| H25B | -772.11  | 2799.11 | 6222.86 | 32 |
| H25C | -231.26  | 2159.42 | 6603.34 | 32 |

file:///Users/joemerola/Desktop/DMMXI059/DMMXI059a\_abs\_tables.html

13/13

|      |         |         |         |    |
|------|---------|---------|---------|----|
| H26A | 4403.14 | 2324.6  | 6024.73 | 25 |
| H26B | 2811.23 | 2030.63 | 5891.76 | 25 |
| H26C | 3652.13 | 1844.47 | 6532.04 | 25 |
| H27  | 2863.02 | 4711.97 | 5030.75 | 12 |
| H28  | 3144.02 | 3357.34 | 4651.03 | 14 |
| H29A | 1064.62 | 4305.48 | 4180.42 | 19 |
| H29B | 1228.58 | 3558.22 | 3936.48 | 19 |
| H30A | 3498.72 | 3788.59 | 3471.32 | 19 |
| H30B | 2385.94 | 4343.76 | 3227.25 | 19 |
| H31A | 4657.74 | 4828.53 | 3548.36 | 16 |
| H31B | 3332.12 | 5117.76 | 3958.81 | 16 |
| H32A | 5266.73 | 4086.17 | 4388.67 | 16 |
| H32B | 5302.39 | 4834.54 | 4644.02 | 16 |
| H1C  | 3207.9  | 5777.5  | 5708.95 | 45 |
| H1D  | 3025.05 | 6286.81 | 5274.77 | 45 |
| H2C  | 8240.27 | 4367.83 | 5507.85 | 35 |
| H2D  | 7941.37 | 3833.82 | 5114.63 | 35 |

### Experimental

Single crystals of  $C_{16}H_{31}Cl_2IrN_2O$  [DMMXI059a\_abs] were []. A suitable crystal was selected and [] on a Xcalibur, Eos, Gemini ultra diffractometer. The crystal was kept at 100.0(6) K during data collection. Using Olex2 [1], the structure was solved with the ShelXT [2] structure solution program using Intrinsic Phasing and refined with the ShelXL [3] refinement package using Least Squares minimisation.

1. Dolomanov, O.V., Bourhis, L.J., Gildea, R.J, Howard, J.A.K. & Puschmann, H. (2009), J. Appl. Cryst. 42, 339-341.
- 2.
- 3.

### Crystal structure determination of [DMMXI059a\_abs]

Crystal Data for  $C_{16}H_{31}Cl_2IrN_2O$  ( $M = 530.53$  g/mol): orthorhombic, space group  $P2_12_12_1$  (no. 19),  $a = 9.16689(15)$  Å,  $b = 20.2059(4)$  Å,  $c = 21.1011(4)$  Å,  $V = 3908.44(12)$  Å<sup>3</sup>,  $Z = 8$ ,  $T = 100.0(6)$  K,  $\mu(\text{MoK}\alpha) = 7.109$  mm<sup>-1</sup>,  $D_{\text{calc}} = 1.803$  g/cm<sup>3</sup>, 86880 reflections measured ( $7.058^\circ \leq 2\theta \leq 64.952^\circ$ ), 13359 unique ( $R_{\text{int}} = 0.0662$ ,  $R_{\text{sigma}} = 0.0432$ ) which were used in all calculations. The final  $R_1$  was 0.0311 ( $I > 2\sigma(I)$ ) and  $wR_2$  was 0.0646 (all data).

### Refinement model description

Number of restraints - 0, number of constraints - unknown.

#### Details:

##### 1. Fixed Uiso

At 1.2 times of:

All C(H) groups, All C(H,H) groups,

All N(H,H) groups At 1.5 times of:

All C(H,H,H) groups, All O(H,H) groups

##### 2.a

Free

rotat  
ing  
group  
:

O1(H1  
C,H1D  
) ,  
O2(H2  
C,H2D  
)

2.b Ternary CH refined with  
riding coordinates:

C11(H11), C12(H12),  
C27(H27), C28(H28)

2.c Secondary CH2 refined with riding coordinates:

N2(H2A,H2B), C13(H13A,H13B), C14(H14A,H14B), C15(H15A,H15B),  
C16(H16A,H16B), N3(H3A,H3B), N4(H4A,H4B), C29(H29A,H29B),  
C30(H30A,H30B), C31(H31A,H31B), C32(H32A,H32B)

2.d Idealised Me refined as rotating group:

C6(H6A,H6B,H6C), C7(H7A,H7B,H7C), C8(H8A,H8B,H8C), C9(H9A,H9B,H9C),  
C10(H10A, H10B,H10C), C22(H22A,H22B,H22C), C23(H23A,H23B,H23C),  
C24(H24A,H24B,H24C), C25(H25A,H25B,H25C), C26(H26A,H26B,H26C)

This report has been created with Olex2, compiled on May 18 2018 14:05:52 for OlexSys. Please [let us know](#) if there are any errors or if you would like to have additional features.
