# Supplementary material
Source: PubMed Central journal article supplement (PMC6748342)

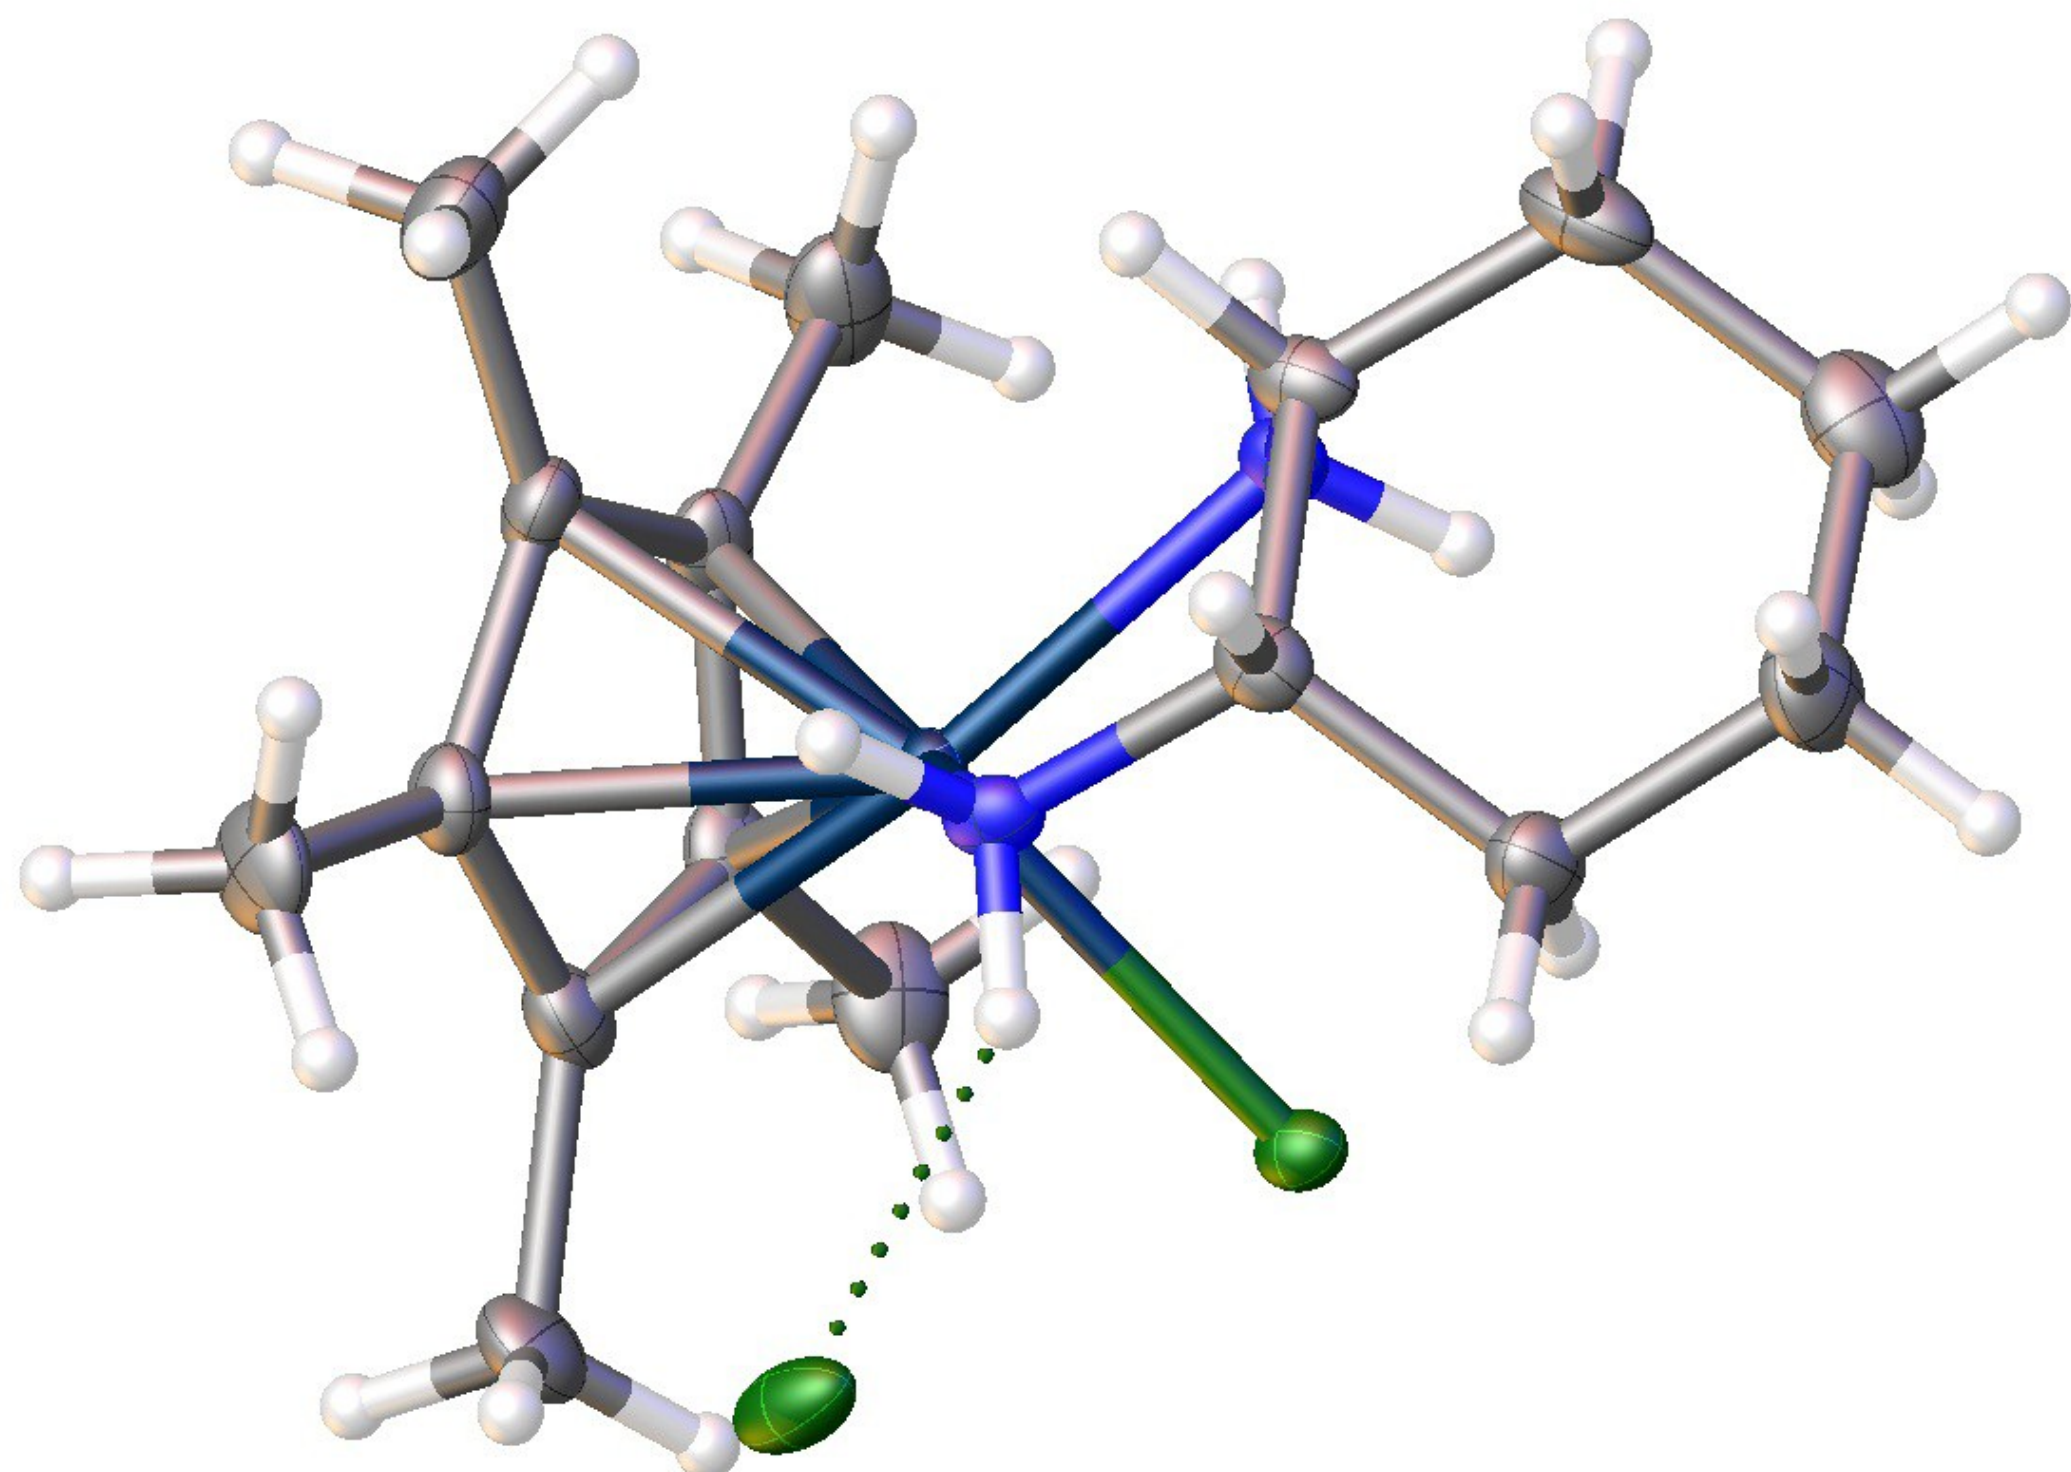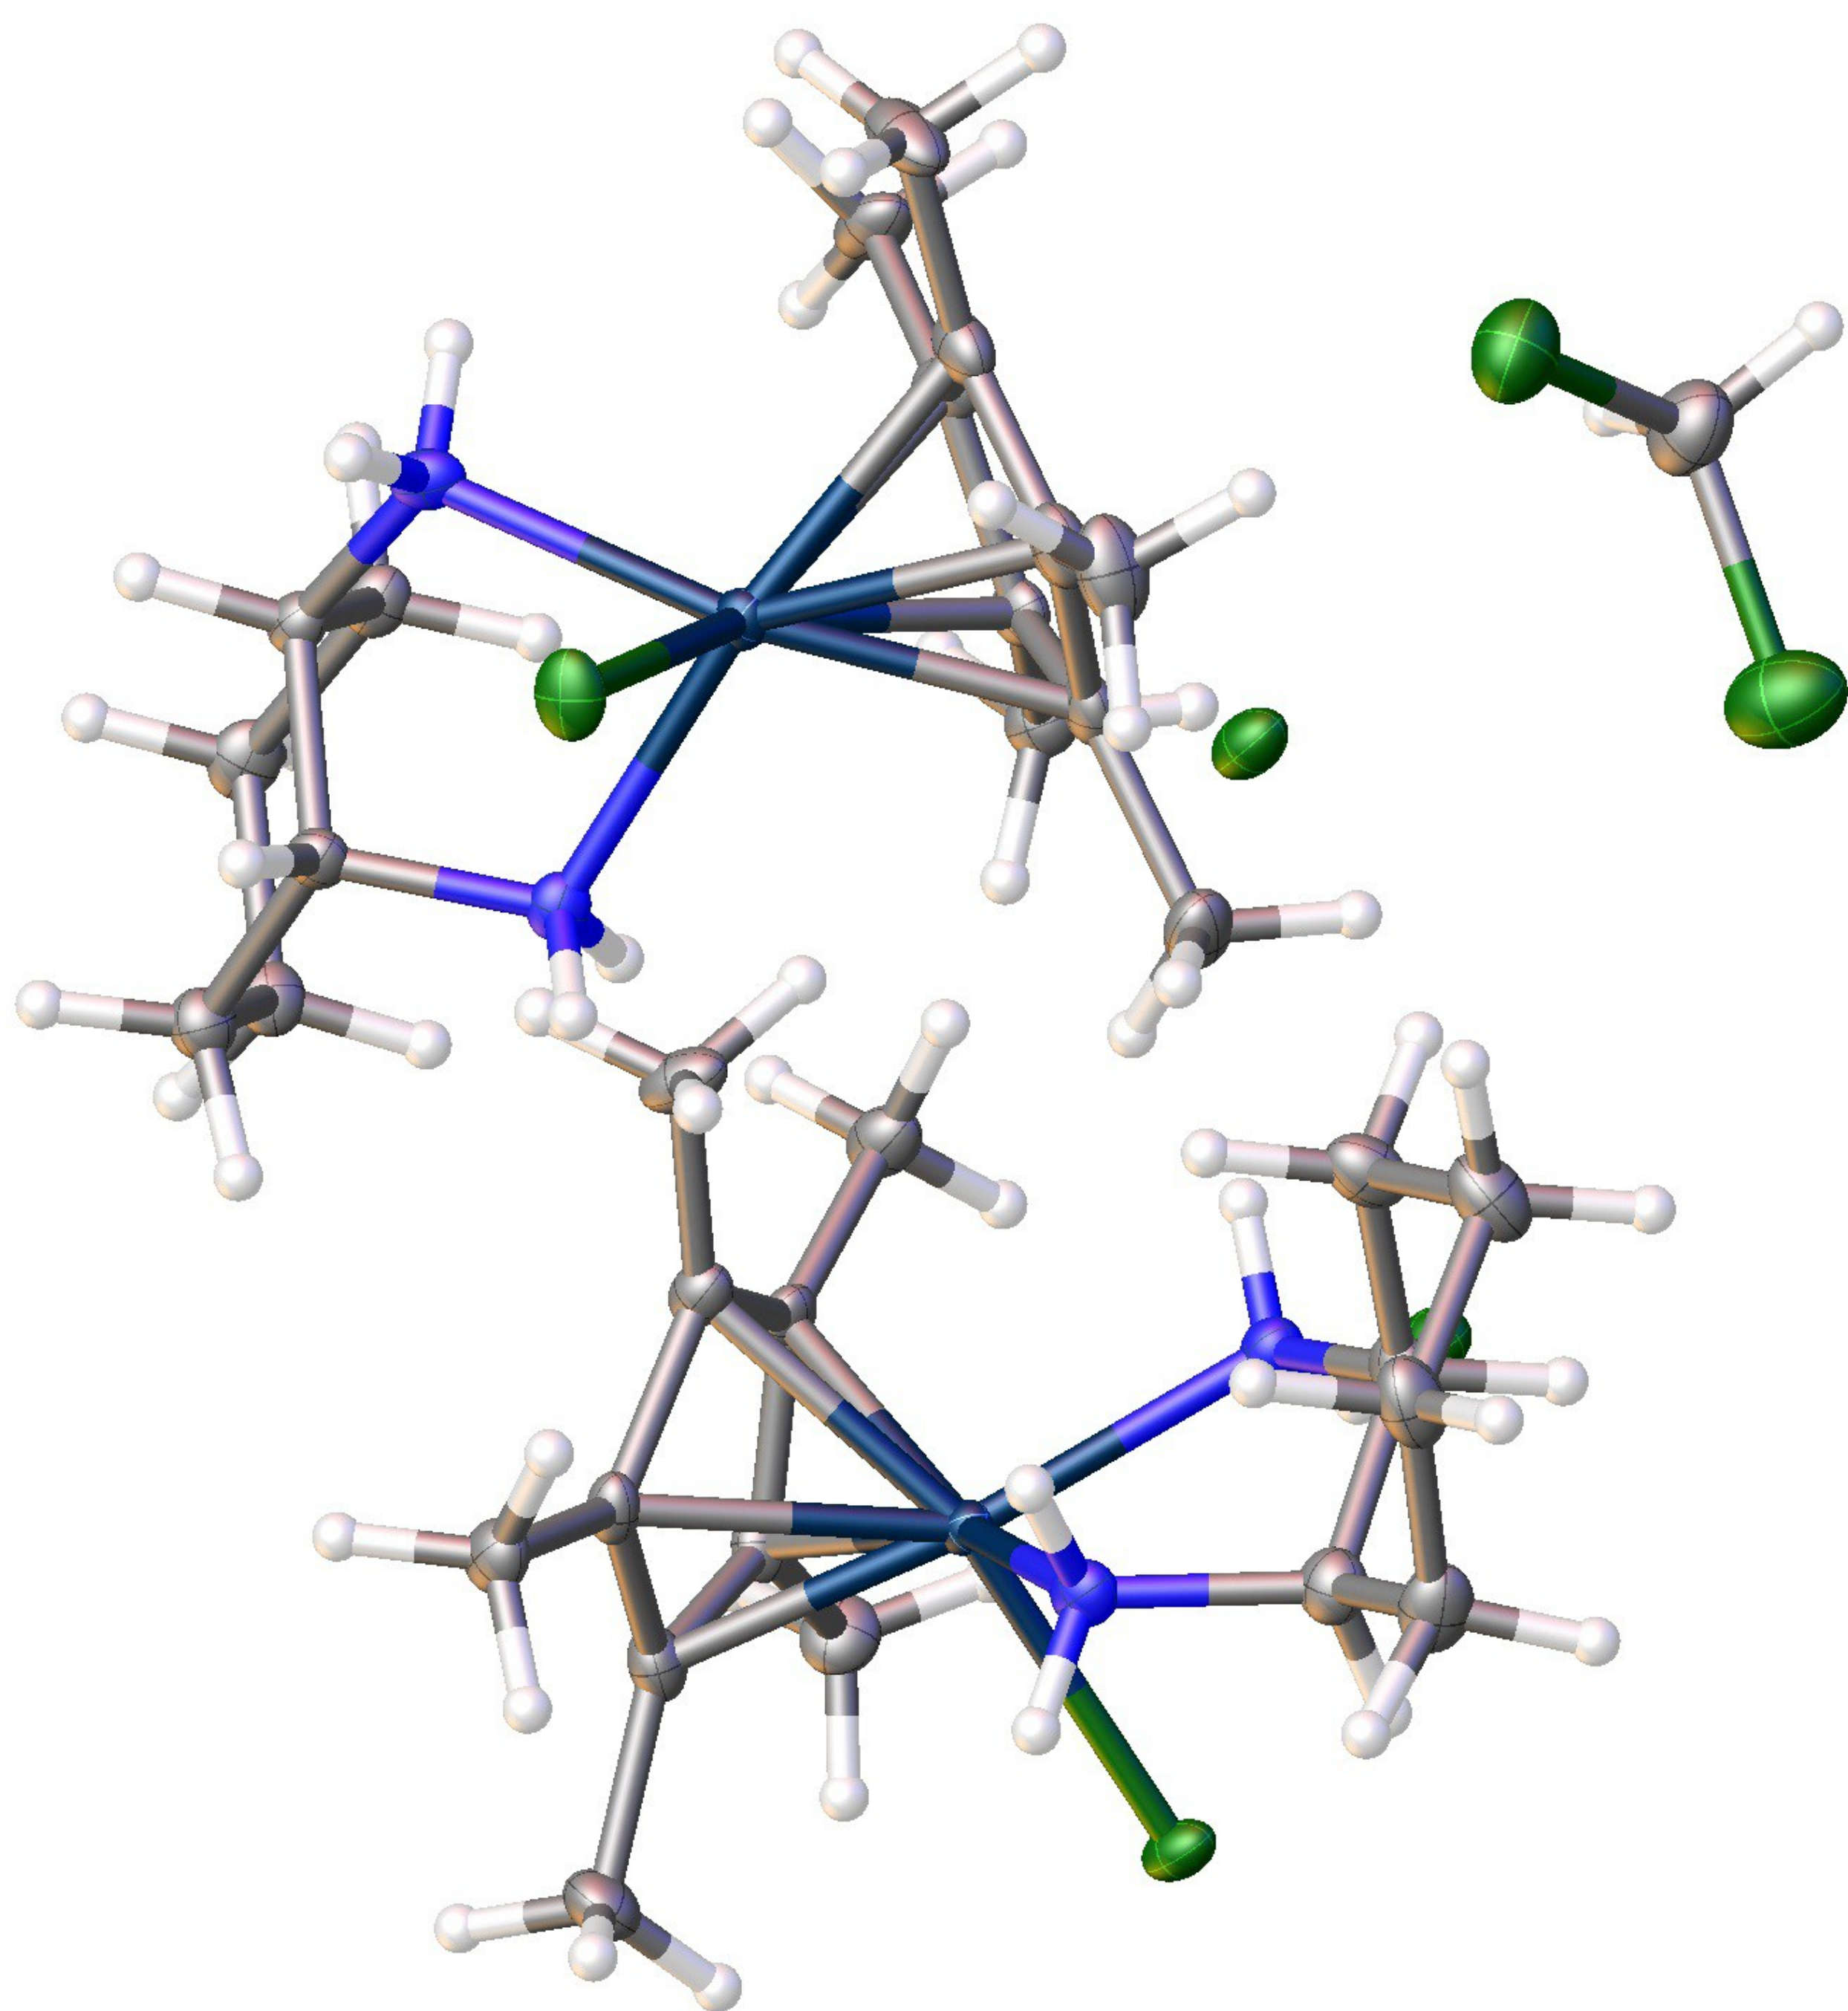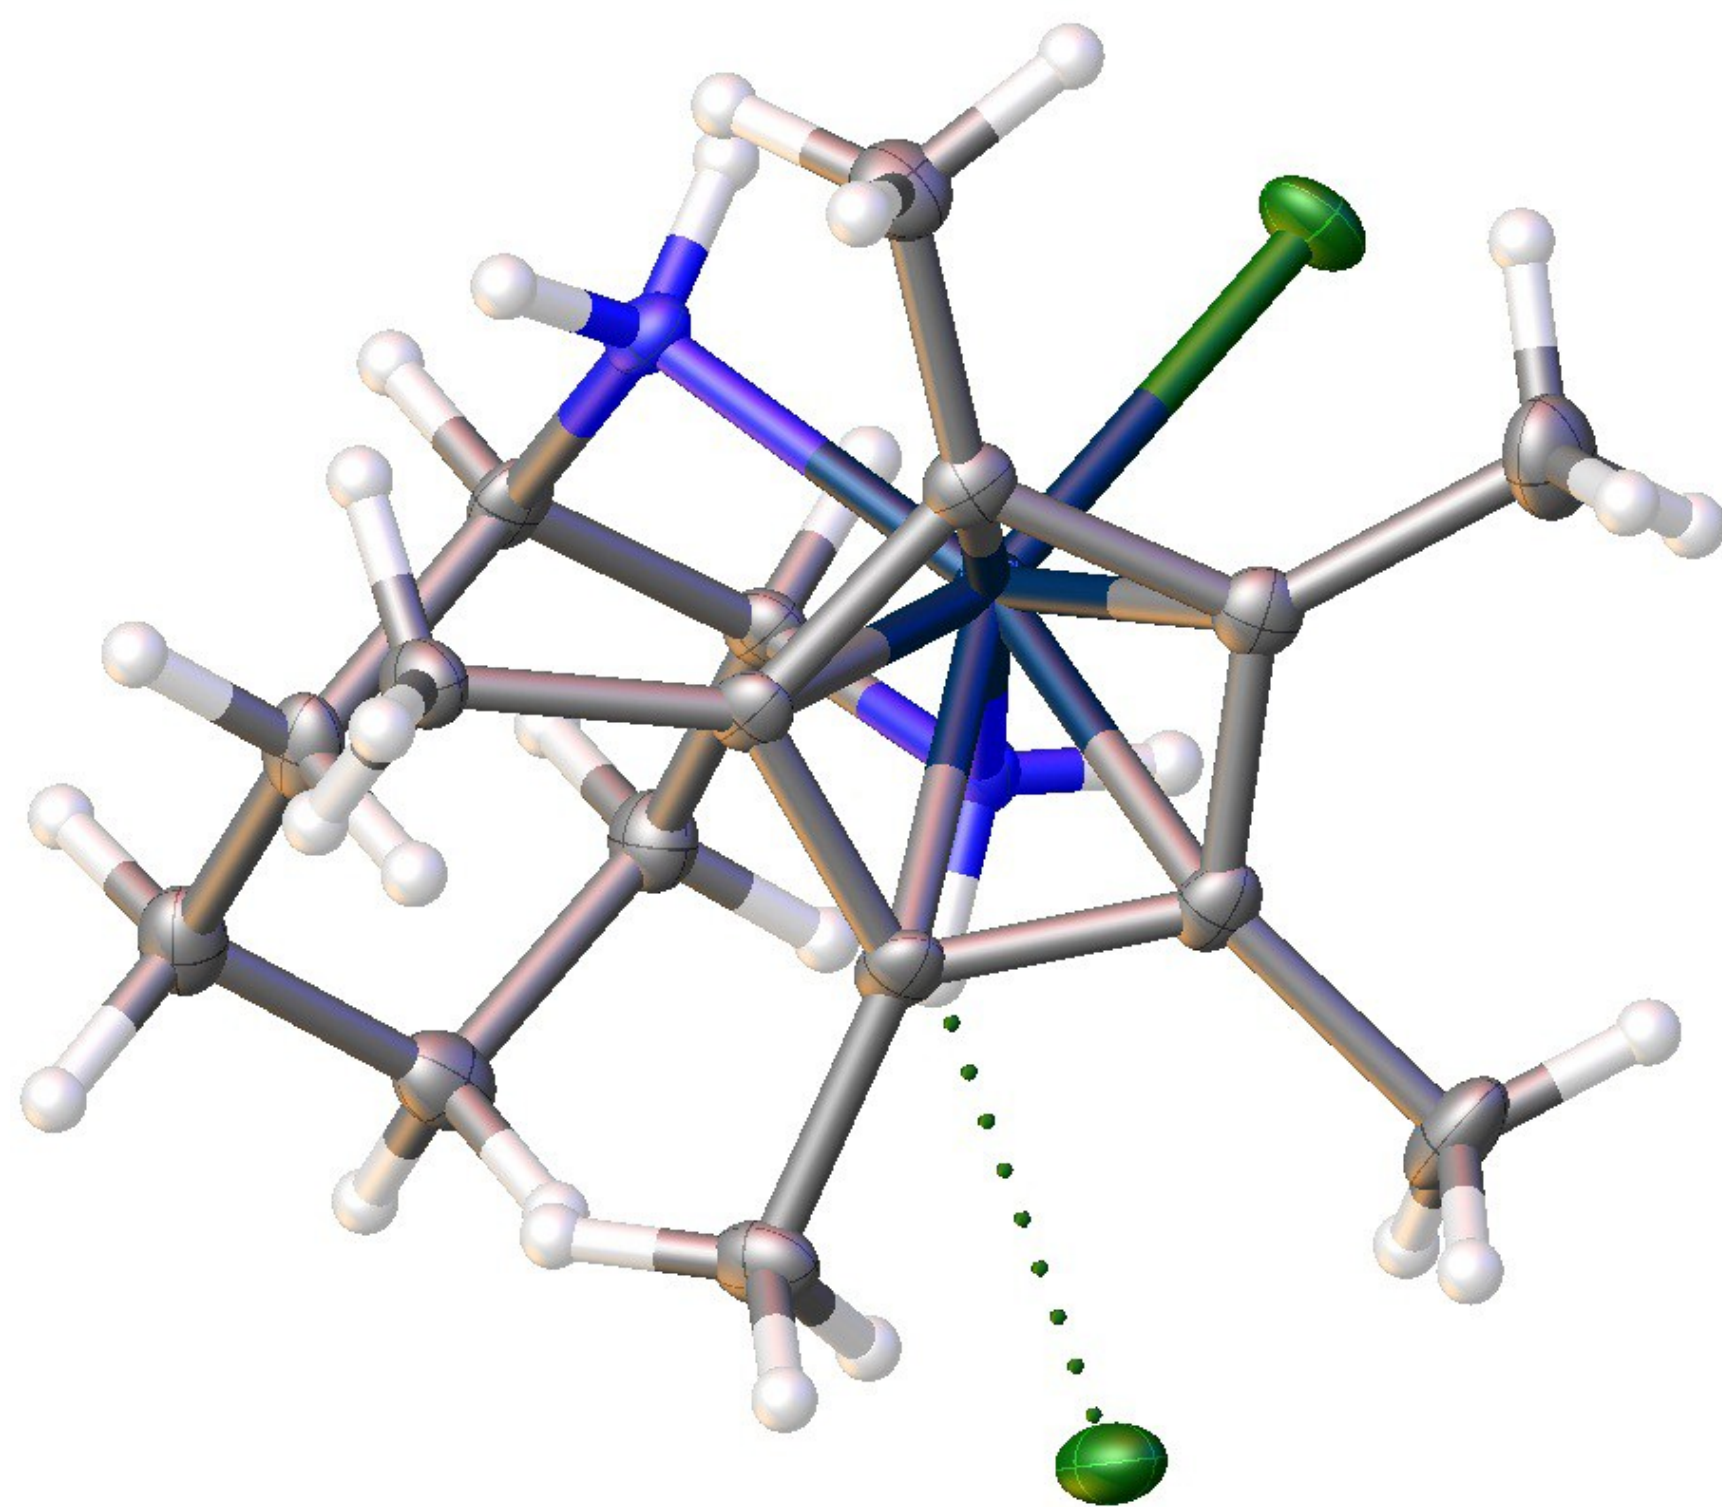

Supplement: MD-010-C9MD00140A-s001.pdf [file MD-010-C9MD00140A-s001.pdf]

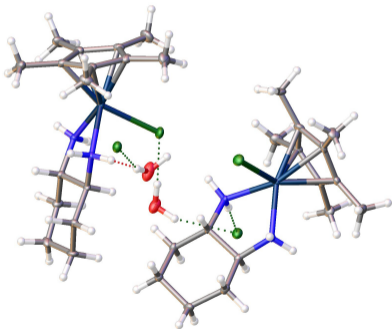

Supplement: MD-010-C9MD00140A-s003.pdf [file MD-010-C9MD00140A-s003.pdf]
